# **Distinct brain-wide presynaptic networks underlie the functional identity of individual cortical neurons**

Ana R. Inácio<sup>1</sup>, Ka Chun Lam<sup>2\*</sup>, Yuan Zhao<sup>2\*</sup>, Francisco Pereira<sup>2</sup>, Charles R. Gerfen<sup>3</sup>, and Soohyun Lee<sup>1</sup>

<sup>1</sup>Unit on Functional Neural Circuits, <sup>2</sup>Machine Learning Team, <sup>3</sup>Section on Neuroanatomy, National Institute of Mental Health, National Institutes of Health, Bethesda, MD, USA

\*Co-second authors

Correspondence: [ana.inacio@nih.gov](mailto:ana.inacio@nih.gov), [soohyun.lee@nih.gov](mailto:soohyun.lee@nih.gov)

Neuronal connections provide the scaffolding for neuronal function. Revealing the connectivity of functionally identified individual neurons is necessary to understand how activity patterns emerge and support behavior. Yet, the brain-wide presynaptic wiring rules that lay the foundation for the functional selectivity of individual neurons remain largely unexplored. Cortical neurons, even in primary sensory cortex, are heterogeneous in their selectivity, not only to sensory stimuli but also to multiple aspects of behavior. Here, to investigate presynaptic connectivity rules underlying the selectivity of pyramidal neurons to behavioral state<sup>1-12</sup> in primary somatosensory cortex (S1), we used two-photon calcium imaging, neuropharmacology, single-cell based monosynaptic input tracing, and optogenetics. We show that behavioral state-dependent neuronal activity patterns are stable over time. These are not determined by neuromodulatory inputs but are instead driven by glutamatergic inputs. Analysis of brain-wide presynaptic networks of individual neurons with distinct behavioral state-dependent activity profiles revealed characteristic patterns of anatomical input. While both behavioral state-related and unrelated neurons had a similar pattern of local inputs within S1, their long-range glutamatergic inputs differed. Individual cortical neurons, irrespective of their functional properties, received converging inputs from the main S1-projecting areas. Yet, neurons that tracked behavioral state received a smaller proportion of motor cortical inputs and a larger proportion of thalamic inputs. Optogenetic suppression of thalamic inputs reduced behavioral state-dependent activity in S1, but this activity was not externally driven. Our results revealed distinct long-range glutamatergic inputs as a substrate for preconfigured network dynamics associated with behavioral state.

## Main Text

### **Introduction**

Anatomical connectivity within and between brain areas governs the distinct activity patterns of individual neurons. In sensory cortical areas, the properties of local presynaptic connections, including their number, strength, and spatial arrangement, shape the selectivity of individual neurons to sensory stimuli<sup>13-22</sup>. Cortical neurons are, however, functionally highly heterogeneous in relation to various aspects of behavioral contexts and states, such as unexpected events, rewards, attentional demands, or spontaneous movements<sup>1-12,23-26</sup>. Even in sensory cortical areas, neurons show highly dynamic activity in the absence of external sensory stimuli<sup>1,7,11</sup>. These behavioral contextual and state signals are thought to be conveyed by long-range projections, including neuromodulatory and glutamatergic afferents from multiple brain areas<sup>27-35</sup>.

One way to establish functional heterogeneity is that a specific set of inputs projects to a subset of neurons, whether the inputs are neuromodulatory or long-range and local glutamatergic and GABAergic, or all the above (Fig. 1a). Alternatively, presynaptic inputs may be random and highly plastic (Fig. 1a). Instead, functional specificity is flexible and may arise from differences in the intrinsic properties of individual neurons. While the mesoscale level of connectivity within and between brain areas has been mapped<sup>36</sup>, linking connectivity rules with the functional identity of individual neurons remains challenging. To address this question, we investigated the architecture of brain-wide presynaptic connectivity in the context of spontaneous movement-sensitive neurons in the primary somatosensory cortex. Spontaneous movements, including whisking and locomotion, are a component of innate behavior. These spontaneous movements are robustly represented in a subset of neurons in a wide range of brain areas<sup>9-11</sup>. However, how the functional specificity of these neurons arises is not clear.

### **Results**

#### **Heterogeneity and stability of spontaneous movement-related activity patterns**

We first characterized the neural representations of spontaneous movements in the whisker primary somatosensory cortex (wS1) of mice. We used two-photon (2-PT)  $\text{Ca}^{2+}$  imaging to monitor the activity of pyramidal neurons (PNs) of right hemisphere wS1 layer (L) 2/3 (Fig. 1b). We induced the expression of the  $\text{Ca}^{2+}$  sensor GCaMP6 in PNs by either injecting a virus carrying GCaMP6f in the wS1 of Emx1-IRES-Cre mice or crossing the CaMK2a-tTA and tetO-GCaMP6s

transgenic mouse lines. Mice were head-fixed on top of a wheel in darkness. A near-infrared camera was used to capture whisker movements (Fig. 1b). A wheel speed encoder was used to measure locomotion speed (Fig. 1b). Mice were not instructed to move, nor were they rewarded. We observed two types of spontaneous movements throughout the recording session. One type consisted of short duration and small amplitude whisker movements without locomotion (W). The other type consisted of longer and larger amplitude whisker movements accompanied by locomotion (WL) (Fig. 1c-e). To assess the relationship between neuronal activity and spontaneous movements, we trained two separate linear decoders to predict whisker movements or locomotion speed from population activity and evaluated their predictive performance. Population neuronal activity exhibited fluctuations coupled to the presence or absence of spontaneous movements and reliably predicted both whisker movements and locomotion speed in out-of-sample data that were not used in training the decoder (Fig. 1f-g). Since the fraction of variance explained by neuronal activity was higher for whisker movements than for locomotion speed (Fig. 1g), we based our neuronal population analysis on the whisker movement prediction<sup>8</sup>. Embedded in the population, individual neurons exhibited heterogeneous patterns of activity in relation to spontaneous movements (Fig. 1f and Extended Data Fig. 1). Of all neurons,  $26 \pm 6.7\%$  were upmodulated (UM) and  $10 \pm 6.3\%$  were downmodulated (DM) during spontaneous movements (Fig. 1h-i). The majority of UM neurons ( $75 \pm 19\%$ ) exhibited activity during WL bouts (referred to as WL neurons), consistent with the interpretation that wS1 is strongly engaged during locomotion<sup>8</sup> (Fig. 1i and Extended Data Fig. 1).

To understand how the spontaneous movement-encoding and sensory stimulus-responsive neuronal populations are represented in wS1, we recorded not only ongoing, but also sensory stimulus-evoked neuronal activity. Sensory stimulation consisted of a periodic deflection of the left whiskers, using a vertically oriented pole. We found that  $10 \pm 5.7\%$  of all neurons responded positively to passive whisker deflection (Extended Data Fig. 2)<sup>24,37</sup>. A fraction of both spontaneous movements non-modulated (NM, mean 9.4%) and modulated (UM, mean 14%; DM, mean 7.9%) neurons responded to sensory stimulation (Extended Data Fig. 2), as observed previously in the visual cortex<sup>11</sup> and wS1<sup>8,24</sup>. Together, these results show that a subset of wS1 PNs reliably encodes spontaneous movements and that the coding of spontaneous movements and sensory stimuli is independent given that some neurons have both properties.

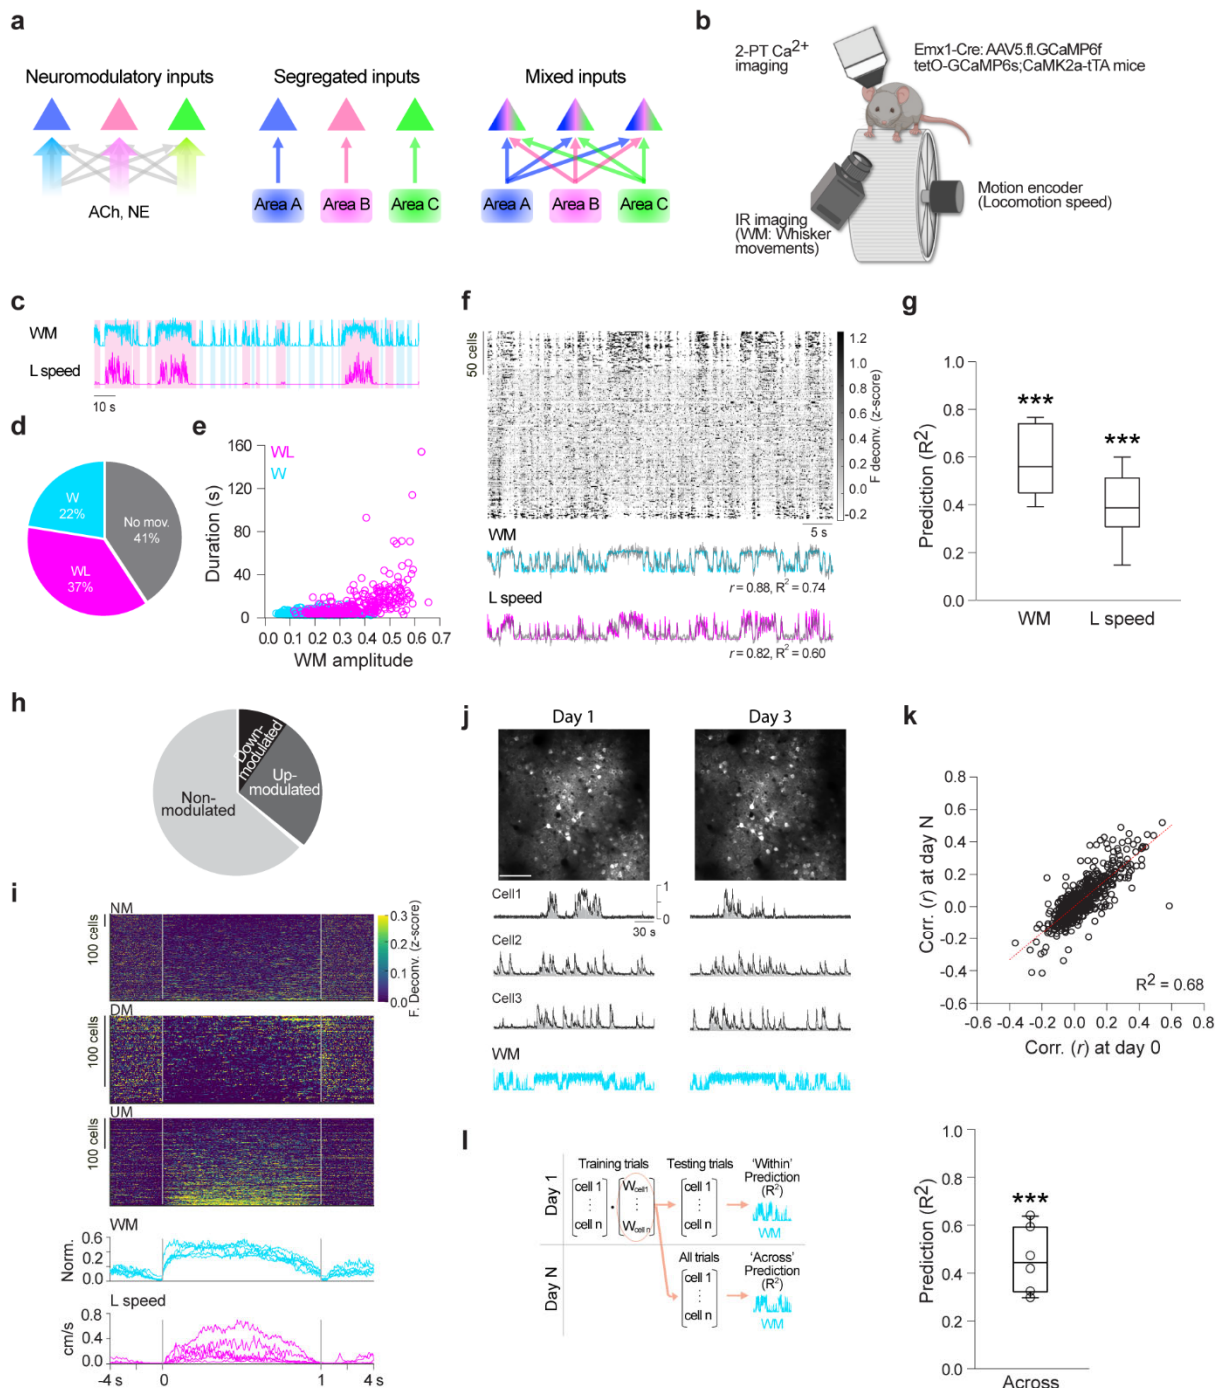

**Fig. 1: Heterogeneity and stability of neuronal activity patterns in relation to spontaneous movements.** **a**, Hypothetical input connectivity models underlying the functional heterogeneity of cortical PNs. PNs with distinct activity patterns are represented by triangles of different colors. Left, heterogeneity is achieved through structured presynaptic neuromodulatory inputs. Middle, heterogeneity arises from a specific set of glutamatergic and/or GABAergic presynaptic networks. Right, the functional properties of neurons are flexible, and their presynaptic networks are anatomically similar. **b**, Illustration of the experimental set-up for 2-PT  $\text{Ca}^{2+}$  imaging of wS1 L2/3 PNs in head-fixed, awake mice. **c**, Example time course of extracted spontaneous movement variables, whisker movements (WM) and locomotion (L) speed. Spontaneous movement types: whisker movements without locomotion (W,

shaded, blue) and whisker movements with locomotion (WL, shaded, pink). Note that locomotion is always accompanied by whisker movements. **d**, Pie chart of time spent per spontaneous movement type (W, WL) and not moving ( $n = 5$  sessions, 5 mice). **e**, Relationship between WM amplitude and duration for W (1268) and WL (321) events ( $n = 5$  sessions, 5 mice). **f**, Top, example raster plot of neuronal activity during spontaneous movements. Individual neurons (201) are sorted from top to bottom by decreasing weight on the first principal component. Bottom, prediction of either WM or L speed from population activity using two separate decoders. Correlation ( $r$ ) between predicted (gray) and actual WM and L speed traces (blue and magenta,  $P < 0.0001$  and  $P < 0.0001$ , respectively), and variance explained ( $R^2$ ) by each model. **g**, Prediction of WM and L speed from neuronal activity. Variance explained across different sessions (WM,  $P = 0.00011$ ; L speed,  $P = 3.8 \times 10^{-6}$ , Wilcoxon sign-rank test,  $R^2 \leq 0$  vs  $R^2 > 0$ ;  $n = 6$  FOVs, 6 sessions, 5 mice). **h**, Pie chart of the relative proportions of NM (715), DM (123), and UM (286) neurons. **i**, Peri-event time histogram (PETH) of NM, DM, and UM neurons for WL events; WL events are time-normalized from onset to offset (vertical bars). **j**, Top, example imaging FOV (session mean image; depth, 218  $\mu\text{m}$ ; 484 x 484  $\mu\text{m}$ ) at day 1 and day 3. Scale bar, 100  $\mu\text{m}$ . Bottom, Activity of example WL neurons and corresponding WM traces at different days. Black, F, and gray, F deconv., both normalized to maximum. **k**, Scatter plot of correlation ( $r$ ) between the activity of individual neurons and WM at day 3 or day 4 vs. day 1 ( $P < 0.0001$ , regression;  $n = 682$ , 6 FOVs, 2 sessions per FOV, 5 mice). **l**, Top, Linear decoder to test the stability of population activity in relation to WM across days. Bottom, Prediction of WM from population activity. Variance explained across days ( $P = 3.8 \times 10^{-6}$ , Wilcoxon signed-rank test across  $R^2 \leq 0$  vs  $R^2 > 0$ ).

We next asked whether the representation of spontaneous movements in wS1 PNs is a stable feature. While both stability and plasticity of sensory coding schemes<sup>38</sup> and spontaneous ensemble activity<sup>39</sup> in primary sensory cortices have been reported, the stability of spontaneous movement-dependent patterns of activity over the course of multiple days has not been directly tested. When tracking the same population of neurons over multiple days, we observed a highly stable correlation between neuronal activity patterns and spontaneous movements (Fig. 1j), both at single-neuron and population levels. The correlation ( $r$ ) between the activity of individual neurons and whisker movements was highly reliable across days (Fig. 1k). To evaluate the stability of population activity in relation to spontaneous movements, we built a linear decoder using data acquired during the first imaging session (day 1, Fig. 1l). We applied this decoder to out-of-sample data collected 3-4 days later (across days). The day 1 model reliably predicted spontaneous movements across days (Fig. 1l), suggesting a stable representation in the population. Our results demonstrate that wS1 PNs reliably represent spontaneous movements over multiple days.

## Blockade of neuromodulatory input

We next investigated the source of the stable encoding of spontaneous movements by wS1 PNs. Multiple studies reported a tight link between neuromodulators, such as acetylcholine (ACh) and noradrenaline (NE), and diverse behavioral states<sup>29-35</sup>, but a direct effect of neuromodulators on

large populations of PNs during spontaneous movements remains to be established. To that end, we implanted a custom-made cranial window with an access port that allowed local application of cholinergic, noradrenergic, or glutamate receptor blockers while imaging wS1 L2/3 PNs (Fig 2a). We blocked different types of receptors in each imaging session, and each session was performed on a different day. In a final session, tetrodotoxin (TTX), a Na<sup>+</sup> channel blocker, was applied to evaluate the effectiveness of drug diffusion. TTX silenced nearly all neuronal activity over the entire FOV within 20 min (Extended Data Fig. 3). The temporal correlation between the activity of individual neurons and spontaneous movements was preserved during ACh or NE receptor blockade (Fig. 2b-c, e-f), suggesting that individual neurons maintain their activity profile during spontaneous movements. In contrast to the effect of ACh or NE receptor blockade, application of an NMDA receptor blocker nearly abolished the correlation between individual neuron activity and spontaneous movements, revealing a strong NMDA-component of spontaneous movement-dependent activity (Fig. 2d, g). The combined action of NMDA and AMPA receptor blockers further uncovered the contribution of glutamatergic inputs for ongoing activity (Fig. 2d, h and Extended Data Fig. 4). We also evaluated the effect of ACh or NE receptor blockade on the magnitude of activity. While both ACh and NE receptor blockade affected the magnitude of movement-related activity in a fraction of WL neurons, the effects of the blockers were higher on whisker stimulus-evoked activity in sensory-responsive neurons (Extended Data Fig. 4). We examined the effect of neuromodulatory and glutamatergic inputs on population activity. For each recording session, we built a linear decoder using neuronal activity and spontaneous movements recorded prior to the application of the receptor blocker(s). We then tested this decoder using the out-of-sample data acquired after blocker application (across conditions). The model consistently predicted spontaneous movements from population activity across conditions when either ACh or NE receptor antagonists were applied, indicating that the structure of movement-related population activity is largely maintained during neuromodulator receptor blockade (Fig 2i). By contrast, the decoder failed to predict spontaneous movements from population activity when either NMDA or a combination of NMDA and AMPA receptor antagonists were tested (Fig. 2i). Local application of the different blockers did not affect spontaneous movement behavior (Extended Data Fig. 5). These results provide evidence for a limited role of neuromodulatory (ACh and NE) inputs in generating highly stable patterns of spontaneous movement-dependent activity.

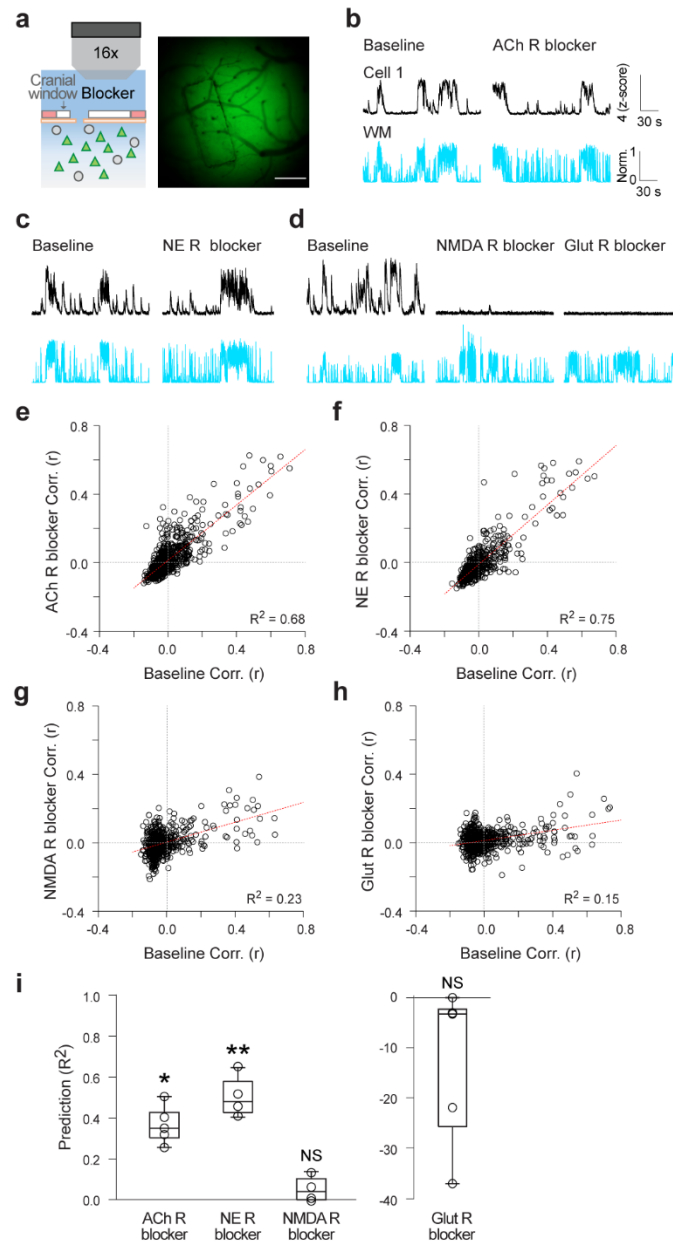

**Fig. 2: Limited role of direct neuromodulatory inputs for spontaneous movement-dependent neuronal activity in wS1. a.** Left, Experimental approach for local delivery of pharmacologic blockers during 2-PT  $\text{Ca}^{2+}$  imaging, based on a custom cranial window. Imaging was performed without (baseline) or with pharmacologic agents in the Ringer's solution, for cortical diffusion. Triangles represent pyramidal neurons. Circles represent GABAergic neurons. Right, Example cranial window with a laser-cut opening. Scale bar, 0.3 mm. **b-d**, Top, Activity of example WL neuron (F, black) before and after pharmacological blockade of ACh (atropine and mecamylamine), NE (prazosin and propranolol), NMDA (DNQX), or NMDA and AMPA (DNQX and D-AP5) receptors (R). Neuromodulatory and glutamatergic (Glut) receptors were tested on separate days. Bottom, whisker movements (WM, blue). **e-h**, Scatter plots of the correlation ( $r$ ) of individual neurons with whisker movements during ACh ( $n = 1256$ , 5 sessions, 5 mice), NE ( $n = 1067$ , 4 sessions, 4 mice), NMDA ( $n = 588$ , 4 sessions, 4 mice), or NMDA and AMPA ( $n = 824$ , 5 sessions, 5 mice) receptor blockade vs. baseline, respectively ( $P < 0.0001$  for all panels). **i**, Prediction of WM from population

activity. Linear decoder predictive  $R^2$ ; the decoder was built using baseline data and evaluated on data acquired during receptor blockade ( $P = 0.027$  ACh R, 0.0039 NE R, 0.13 NMDA R, 0.99 Glut R, Wilcoxon signed-rank tests across  $R^2 \leq 0$  vs  $R^2 > 0$ ).

### Single-cell based monosynaptic retrograde tracing

Based on the highly stable, glutamate receptor-sensitive activity of a subset of wS1 PNs during spontaneous movements, we hypothesized that a distinct anatomical organization of presynaptic networks may constrain the spontaneous movement-dependent activity profiles of PNs. To reveal the presynaptic network of functionally identified neurons at the single-cell level, we adapted a single-neuron based monosynaptic retrograde tracing approach<sup>16,19,40-43</sup> (Fig. 3a). We first imaged wS1 L2/3 PNs and selected a target neuron based on its activity profile during spontaneous movements (example WL neuron, Fig. 3a, b). We then performed 2-PT guided electroporation of the target neuron with DNA encoding for TVA (rabies virus (RV) receptor), G (RV spike protein), and mCherry (for validation of transfection) (Fig. 3a and Extended Data Fig. 6). Following electroporation, we injected a RV variant carrying a red fluorescent protein (RFP, mCherry  $n = 2$  brains, tdTomato  $n = 20$  brains) close to the electroporated neuron. In line with previous studies<sup>16,19</sup>, at day 4-5 we observed the emergence of RFP<sup>+</sup> presynaptic neurons in wS1. We detected the RFP<sup>+</sup> neurons exclusively in brains where the electroporated neuron survived for several days and expressed mCherry (postsynaptic neuron), confirming the specificity of our approach (Extended Data Fig. 7). To reveal presynaptic neurons, animals were perfused at day 11 ( $\pm 1.5$  days), and whole brains were analyzed histologically. Presynaptic neurons were manually annotated according to anatomical area and identified as glutamatergic or GABAergic based on the immunostaining with GABA. Brains were registered to the Allen Mouse Common Coordinate Framework, and annotations were validated (Fig. 3c).

We performed single-cell based retrograde tracing of two functionally distinct subpopulations of neurons: NM (non-modulated,  $n = 11$ , 11 mice) and WL (whisking-locomotion,  $n = 11$ , 11 mice) neurons (Fig. 3b, d). To narrow down the functional populations and eliminate the confounding factor of somatosensory input, for both groups, we selected neurons that were not responsive to sensory stimulation. Spontaneous movements, the proportion of spontaneous movement-dependent subpopulations of wS1 L2/3 PNs, and cortical depth of the postsynaptic (target) neurons were similar between the two groups (Extended Data Fig. 8).

To analyze the brain-wide arrangement of presynaptic connectivity, we compared the fraction of presynaptic cells from each brain area between the two groups. Variability in the total

number of presynaptic neurons across brains is expected due to differences in the survival time of each postsynaptic neuron<sup>44</sup>. Yet, the distribution of the total number of presynaptic neurons per brain was comparable for the NM (range = 137-2038,  $n = 11$ ) and WL groups (range = 148-2727,  $n = 11$ ) (Fig. 3e). We observed a strong linear association between the number of local vs. total presynaptic neurons per brain in the NM and WL groups (Fig. 3f and Extended Data Fig. 9 for long-range vs. total presynaptic neurons). Based on the linear association, we concluded that comparing fractional presynaptic inputs onto postsynaptic neurons of the two groups is appropriate.

### Local (wS1) presynaptic networks

Spontaneous movement-encoding neurons are spatially scattered throughout wS1. We first investigated whether spontaneous movement-encoding neurons (WL group) receive inputs from distinctive local, wS1 presynaptic networks. Presynaptic neurons located in wS1 constituted the largest fraction of brain-wide inputs to each postsynaptic neuron:  $79 \pm 6.0\%$  for the NM group ( $n = 11$ ) and  $81 \pm 6.0\%$  for the WL group ( $n = 11$ ) (Fig. 3g and Extended Data Fig. 9, for fraction of long-range inputs). Of all wS1 presynaptic neurons, the majority were glutamatergic:  $86 \pm 7.4\%$  for the NM group ( $n = 10$ ) and  $90 \pm 5.5\%$  for the WL group ( $n = 11$ ) (Extended Data Fig. 9). Glutamatergic presynaptic neurons were, on average, broadly distributed across L2/3, L4 and L5 but significantly less predominant in L6 for both groups (Fig. 3h). Individual glutamatergic presynaptic networks were often characterized by a smaller fraction of L4 compared to L2/3 or L5 neurons<sup>45,46</sup>. The predominance of this laminar profile was comparable between the groups. Additionally, the fraction of glutamatergic inputs from each layer was similar between the groups. In contrast to the broad vertical distribution of glutamatergic inputs, GABAergic presynaptic neurons were mostly limited to L2/3 (Fig. 3i)<sup>19</sup>. Yet, the fraction of GABAergic inputs per layer did not differ between the two groups. These results demonstrate that the functionally distinct neurons have a similar proportion of local presynaptic neurons across layers.

Next, we explored the spatial distributions of wS1 presynaptic networks of the NM and WL groups. The three-dimensional and two-dimensional (layer-by-layer horizontal flat projections) spatial distributions of wS1 glutamatergic and GABAergic presynaptic networks were not significantly different between the groups (Fig. 3j). To further characterize the horizontal

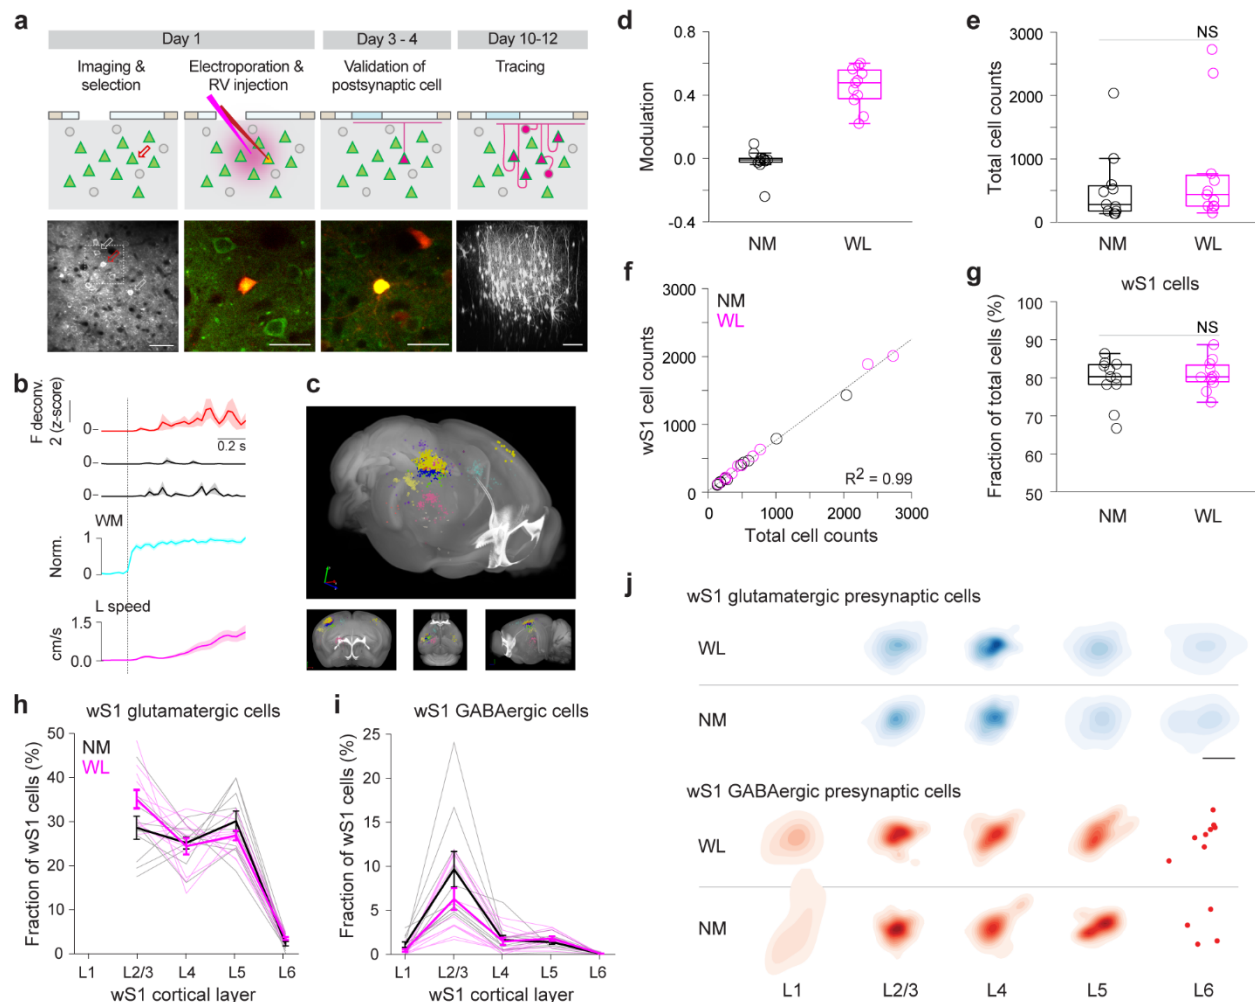

**Fig. 3: Functionally distinct neurons have anatomically similar local presynaptic networks.** **a**, Experimental procedure for tracing monosynaptic inputs to a single, functionally identified PN. Day 1: Left, Imaging and selection of a target neuron (red arrow) based on its activity profile with respect to spontaneous movements. Example imaging FOV (depth, 266  $\mu\text{m}$ ; 271 x 271  $\mu\text{m}$ ). Scale bar, 50  $\mu\text{m}$ . Right, 2-PT guided electroporation of the target neuron with Alexa 594 and DNA (for TVA, G, and mCherry), and subsequent injection of RV-RFP. Image (79 x 79  $\mu\text{m}$ ) of the target neuron immediately after electroporation (GCaMP6s<sup>+</sup>/Alexa594<sup>+</sup>). Scale bar, 25  $\mu\text{m}$ . Day 3-4: Evaluation of survival and transfection. Image of the target neuron expressing mCherry (GCaMP6s<sup>+</sup>/mCherry<sup>+</sup>). Scale bar, 25  $\mu\text{m}$ . Day 10-12: Emergence of the local presynaptic network (RFP<sup>+</sup>). Three-dimensional projection of z-stacks (814 x 814 x 785  $\mu\text{m}$ ) of wS1 presynaptic neurons (RFP<sup>+</sup>). Scale bar, 100  $\mu\text{m}$ . **b**, Activity (F deconv. 2 (z-score)) of the example target neuron (red) and two surrounding neurons (black, indicated by white arrows in a) aligned to the onset of WL events (mean  $\pm$  s.e.m.). **c**, Brain-wide presynaptic network of the example postsynaptic neuron (shown in a and b) in the Allen Mouse Common Coordinate Framework. Presynaptic neurons were anatomically parsed. **d**, Mean modulation of all postsynaptic neurons during WL events (11 NM neurons from 11 mice, and 11 WL neurons from 11 mice, 1 neuron per mouse). **e**, Total number of presynaptic neurons per brain for each postsynaptic neuron group ( $P = 0.39$ , randomization test). **f**, Scatter plot of wS1 vs. total presynaptic neurons ( $P < 0.0001$ , regression). **g**, Proportion of presynaptic neurons in wS1 for NM and WL postsynaptic neurons ( $P = 0.52$ , randomization test). **h**, Distribution of wS1 glutamatergic presynaptic neurons of NM ( $n = 10$ ; individual brains, gray; mean  $\pm$  s.e.m., black) and WL ( $n = 11$ ; individual brains, pink; mean  $\pm$  s.e.m., magenta) postsynaptic

neurons across cortical layers (layers:  $P < 0.01$  L6 vs all other layers, Kruskal-Wallis test ( $P < 0.0001$ ) followed by a Dunn's test with Bonferroni correction; L4-based profile,  $P = 0.95$ , randomization test with Chow test statistics; NM vs. WL:  $P_{L2/3} = 0.065$ ,  $P_{L4} = 0.74$ ,  $P_{L5} = 0.20$ ,  $P_{L6} = 0.12$ ). **i**, Distribution of wS1 GABAergic presynaptic neurons ( $P < 0.01$  L2/3 vs. all other layers, Kruskal-Wallis test ( $P < 0.0001$ ) followed by a Dunn's test with Bonferroni correction; GABAergic NM vs. WL,  $P_{L2/3} = 0.16$ ;  $P_{L4} = 0.79$ ;  $P_{L5} = 0.28$ ). **j**, Group horizontal projections of the weighted distributions of wS1 glutamatergic or GABAergic presynaptic neurons per cortical layer (glutamatergic, NM vs. WL,  $P_{L2/3} = 0.73$ ,  $P_{L4} = 0.39$ ,  $P_{L5} = 0.066$ ,  $P_{L6} = 0.26$ ; GABAergic, NM vs. WL,  $P_{L2/3} = 0.86$ ;  $P_{L4} = 0.84$ ;  $P_{L5} = 0.31$ ; L2/3 glutamatergic vs GABAergic average pairwise distance between neurons,  $P = 2.5 \times 10^{-9}$ ,  $t$ -test). Scale bar, 500  $\mu\text{m}$ .

spread of wS1 glutamatergic presynaptic networks across layers, we performed gaussian density estimation on the layer projections (Extended Data Fig. 10). L4 glutamatergic presynaptic neurons were restricted to a smaller cortical span (cell pairwise distance mean,  $\sim 309 \mu\text{m}$ ) than L2/3 or L5 glutamatergic presynaptic neurons (mean,  $\sim 417$  and  $505 \mu\text{m}$ , respectively). This result is consistent with the interpretation that L2/3 neurons receive inputs predominantly from one main barrel. We observed this feature in all 22 presynaptic networks of both groups. GABAergic presynaptic neurons were more spatially confined than glutamatergic presynaptic neurons<sup>19</sup> (cell pairwise distance mean for L2/3,  $272 \pm 71 \mu\text{m}$  for GABAergic vs  $417 \pm 46 \mu\text{m}$  for glutamatergic) (Fig. 3j). These results demonstrate that the functionally distinct sets of neurons (NM and WL) have, somewhat surprisingly given their remarkably different activity patterns, a similar pattern of local glutamatergic and GABAergic inputs, not only in terms of number but also spatial distribution across all cortical layers.

### Long-range presynaptic ensembles

We next investigated whether movement-encoding (WL) neurons receive a distinctive set of brain-wide, long-range inputs (Fig. 1a). Recent studies provided insights into the organization of local inputs onto individual PNs in primary visual cortex in the context of visual stimuli<sup>16,19</sup>. Yet, how the spontaneous movement-dependent, heterogenous activity patterns of L2/3 neurons relate to long-range inputs has not been explored. Analysis of the single-cell based, whole-brain presynaptic networks revealed the distribution of presynaptic neurons in multiple cortical and subcortical brain areas that are known to project to wS1<sup>45-47</sup>: secondary somatosensory cortex (S2), primary and secondary motor cortices (M1/2), thalamus, other sensory cortical areas (SenCtx, including auditory visual cortices), contralateral wS1 (cwS1), perirhinal cortex (PrhCtx), and basal forebrain (BF) (Fig. 4a). Brain areas containing, on average, less than 0.5% of total presynaptic cells were

grouped into ‘Others’. All long-range presynaptic neurons were glutamatergic. Inputs from cwS1 followed a highly topographic arrangement. Most input areas were ipsilateral, with a few exceptions such as the PRhCtx. Irrespective of its activity pattern, each postsynaptic neuron from both the NM and WL groups received inputs from, on average, 6.5 of the 7 major brain areas known to project to wS1 (Fig. 4a-b). These results suggest that a high degree of integration or multiplexing can occur at the single-cell level. While all postsynaptic cells from both groups received direct inputs from a wide range wS1-projecting brain areas, we found that, surprisingly, WL neurons receive a lower fraction of inputs from M1/2 than NM neurons (Fig. 4a, c). In contrast, WL neurons received a significantly higher fraction of inputs from thalamus relative to NM neurons (Fig. 4a, d). Most thalamic presynaptic neurons were found in the first order thalamic relay nucleus, ventral posteromedial nucleus (VPM), and the higher order thalamic nucleus, posteromedial nucleus (POm) (Extended Data Fig. 11). Presynaptic neurons of WL neurons were equally prevalent in VPM and POm (Extended Data Fig. 11). Furthermore, the modulation of the activity of postsynaptic neurons across spontaneous movements (i.e., change in activity during movement relative to baseline, prior to movement onset) was negatively correlated with the fraction of presynaptic neurons found in M1/2 (Fig. 4e) and positively correlated with the fraction of presynaptic neurons found in thalamus (Fig. 4f). Within each long-range input area, the spatial distribution of presynaptic neurons was similar for the NM and WL groups (Extended Data Fig. 12), suggesting that the functionally distinct postsynaptic neurons receive inputs from spatially intermingled long-range neurons. Overall, these results demonstrate that, despite the high degree of convergence of inputs from multiple brain areas to single neurons in wS1, spontaneous movement-encoding wS1 PNs (WL) show characteristic brain-wide presynaptic inputs, with a relatively larger fraction of thalamic, but lower fraction of motor cortical inputs.

Given that WL neurons receive more abundant inputs from the thalamus, we next asked whether the spontaneous movement-related activity in these neurons is caused by sensory feedback from voluntary whisker movements (Fig. 4g). We imaged right hemisphere wS1 L2/3 PNs before and after paralysis of the left facial muscles by injection of botulinum toxin (BTX) in the left mystacial pad (Fig. 4h). The same population of PNs was reimaged 2-3 days after BTX injection. This procedure was minimally invasive but effectively abolished left whisker movements (Fig. 4i) without interrupting right whisker movements and locomotion (Extended Data Fig. 13). Since left

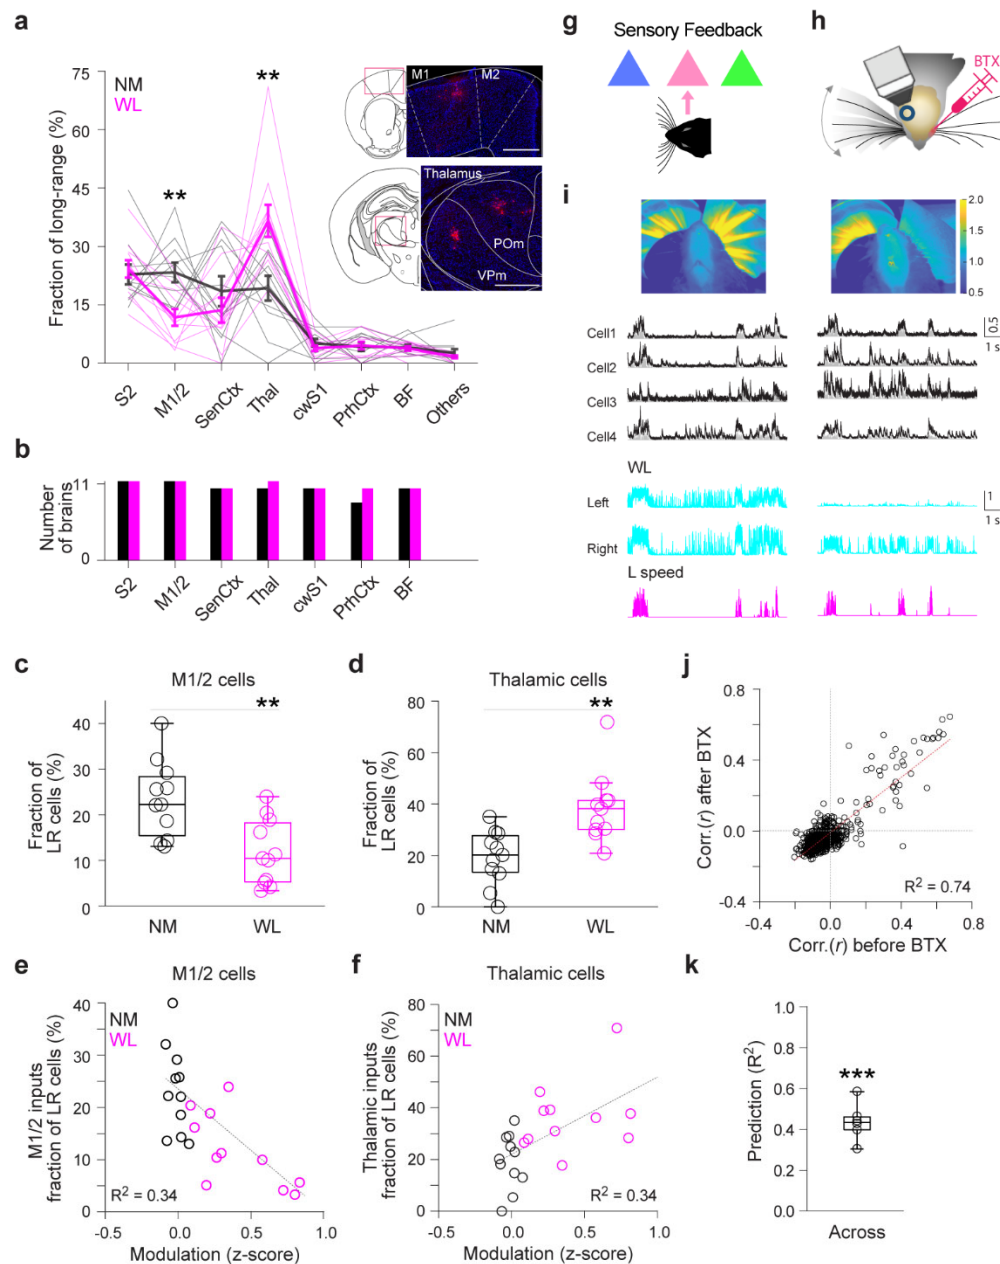

**Fig. 4: Functionally distinct neurons receive characteristic long-range inputs.** **a**, Distribution of the presynaptic network of each NM ( $n = 11$ , gray; mean  $\pm$  s.e.m., black) or WL postsynaptic neuron ( $n = 11$ , pink; mean  $\pm$  s.e.m., magenta) across multiple brain areas. Inset, example epifluorescence images of coronal brain slices denoting the presence of presynaptic neurons (RFP<sup>+</sup>) in distal brain areas, including M1/2 and thalamus (predominantly in VPm and POm) (from example presynaptic network shown in Fig. 3a, d). Scale bar, 500  $\mu$ m. **b**, Number brains containing presynaptic neurons in each of the listed brain areas. NM group, black; WL group, magenta. Note the high degree of convergence of inputs from diverse areas at the single-cell level. **c-d**, Motor cortical (c) and thalamic (d) inputs onto individual postsynaptic neurons ( $P = 0.0030$  and  $P = 0.0030$ , respectively, randomization test). **e-f**, Motor cortical (e) and thalamic (f) input fraction as function of the average modulation of the postsynaptic across all spontaneous movements (W and WL) ( $P = 0.0048$  for M1/2, and  $P = 0.0045$  for thalamus, regression). **g**, Sensory feedback from moving whiskers as a hypothetical source of movement-related activity in a subset of PNs in wS1. **h**, Schematic of imaging over the right

hemisphere wS1 before (left) and 1-2 days (right) after BTX injection in the left mystacial pad. **i**, Top, Example images of videorecorded whisker movements (WM, mean of the absolute difference between consecutive frames over ~2 min), before and after BTX injection. Warmer colors reflect a higher motion. The BTX injection effectively paralyzed the left mystacial pad ( $n = 5$  mice). Bottom, Example neurons and activity traces with corresponding bilateral WM and locomotion (L) speed traces before and after BTX injection. Black, F, and gray, F deconv., both normalized to maximum. **j**, Correlation ( $r$ ) of the activity of individual neurons with WM after vs. before BTX injection ( $P < 0.0001$ , regression,  $n = 1044$ , 6 FOVs, 2 sessions per FOV, 5 mice). **k**, Prediction of WM from population activity. Out-of-sample  $R^2$  of a baseline decoder evaluated on data collected 1-2 days after BTX injection ( $P = 0.00024$ , Wilcoxon signed-rank test across  $R^2 \leq 0$  vs.  $R^2 > 0$ ).

and right whisker movements were highly correlated ( $r$  left vs. right =  $0.959 \pm 0.0165$ ,  $n = 4$  sessions, 4 mice), we used the right whisker movements to detect changes in spontaneous movement-dependent activity after paralysis of the left mystacial pad (Fig. 4i). We observed that the correlation between the activity of individual neurons and spontaneous movements was highly preserved even after paralysis (Fig. 4j). Beyond correlation, we found that the modulation of individual neurons during spontaneous movements was similar before and after paralysis (Extended Data Fig. 13). We again used a linear decoder to examine neuronal activity changes in the population. The model was built using neuronal activity and spontaneous movements measured prior to paralysis. We then evaluated the same model on out-of-sample data recorded after paralysis (across days). Model predictions were highly reliable on out-of-sample data, consistent with the interpretation of a robustly stable structure in the neuronal population activity in the absence of direct sensory feedback (Fig. 4k). These results suggest that sensory feedback evoked by whisker movements does not play an instrumental role in driving spontaneous movement-related activity in wS1.

### Suppression of long-range thalamic inputs

Finally, we asked if the anatomical signature of predominant thalamic inputs to WL neurons contributes to activity during spontaneous movements. We imaged PNs while simultaneously suppressing thalamic terminals in wS1 L2/3 (Fig 5a). To that end, we expressed the red-shifted inhibitory opsin archaerhodopsin ArchT, coupled to tdTomato, in the VPm and POm of tetO-GCaMP6s;CaMK2a-tTA mice (Fig. 5a-b). Mice that did not express ArchT served as controls. Light pulses (1 s) were randomly provided during the recording session. Light off periods were used to identify neurons as NM or WL. We observed that light pulses elicited a relatively small,

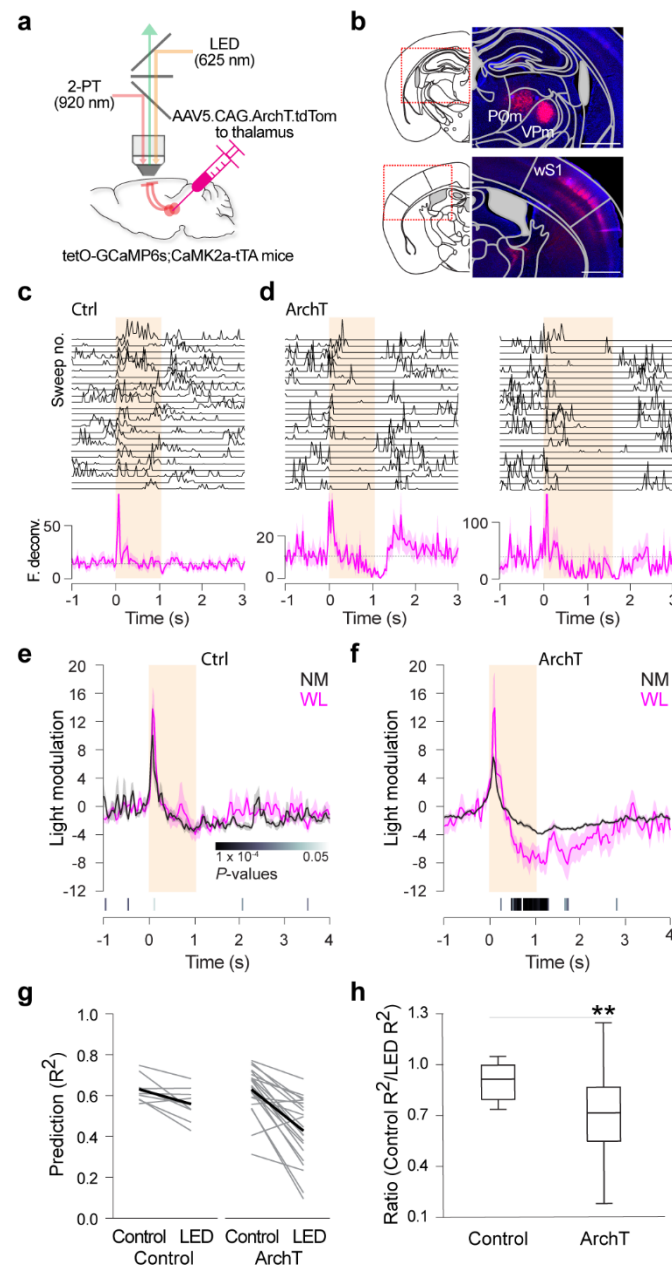

**Fig. 5: Optogenetic suppression of thalamic inputs reduces spontaneous movement-related activity.** **a**, Schematic of the experimental approach for imaging of L2/3 PNs and simultaneous optogenetic suppression of VPm and POm axon terminals (ArchT<sup>+/tdTom</sup><sup>+</sup>) in wS1. **b**, Example composite epifluorescence images of coronal brain sections showing tdTom<sup>+</sup> cell bodies in VPm and POm (bottom), and corresponding axon terminals in wS1 (top) in an ArchT-expressing mouse. Scale bars, 1 mm. **c-d**, Effect of light pulses on the activity of WL neurons. **c**, Example neuron from a control mouse (ArchT<sup>-</sup>/tdTom<sup>+</sup>). **d**, Example neurons from ArchT-expressing mice. Top, responses to individual light pulses (F deconv.). Bottom, average PETH of baseline-subtracted activity (F deconv.). Orange shaded area indicates light pulse duration (1-1.5 s). **e-f**, Baseline-subtracted mean activity (LED modulation) of NM (black) or WL (magenta) neurons significantly affected by light pulses. *P* values, comparison of activity of NM and WL neurons (Wilcoxon rank sum test, Bonferroni correction). **e**, Control mice (neurons significantly changed by light stimulation, *n* = 6 of 63 NM and *n* = 8 of 85 WL, 6 mice). **f**, ArchT-expressing mice (neurons significantly changed by light

stimulation,  $n = 146$  of 645 NM and  $n = 25$  of 182 WL, 7 mice). **g**, Prediction of WM by population activity using a model trained on light-off data and evaluated on light-off and light-on data (explained variance). **h**, Out-of-sample  $R^2$  ratio ( $R^2_{\text{LightOn}} / R^2_{\text{LightOff}}$ ,  $P = 0.0095$ , Wilcoxon rank-sum test).

brief (~0.5 s) whisker movement in both control and ArchT-expressing mice (Extended Data Fig. 14). This whisker movement was independent of the ongoing movements of the animal and could potentially obfuscate neuronal recordings. To isolate changes in neuronal activity caused by thalamic terminal suppression from those caused by this light-evoked brief whisker movement, we restricted our single neuron analysis to the second half of the light pulse (0.5-1.0 s), during which the level of ongoing movements was similar to that of baseline (before the light pulse) (Extended Data Fig. 14). The level of ongoing movements during the baseline period was comparable between groups (Extended Data Fig. 14). In ArchT-expressing mice, optogenetic suppression of thalamic terminals significantly altered the activity levels in a fraction (14%) of WL neurons, producing a net decrease in their activity. This decrease was significantly larger than changes observed in NM neurons (Fig. 5c-f). In control mice, while we also detected changes in the activity of a fraction of WL neurons (8%), the net effect did not differ from that of NM neurons. To address the optogenetic effect in a more comprehensive manner, we built a linear decoder to predict spontaneous movements from neuronal activity using light-off periods. We then tested this model on data acquired during light presentation and found a consistently larger decrease in  $R^2$  values in mice expressing ArchT than in control mice (Fig. 5g-h). In some experiments, the  $R^2$  value was close to zero, demonstrating that inhibition of thalamic input critically changed the relationship between population activity and spontaneous movements. These results provide evidence for the contribution of sensory feedback-independent, thalamic inputs to spontaneous movement-related activity in cortical neurons.

## Discussion

Here, we investigated anatomical wiring rules for the functional heterogeneity of cortical neurons. Our results provide insights into the functional and anatomical organization of cortical PNs in the context of behavioral state. We first demonstrated that the representation of spontaneous movements in wS1 PNs is stable over multiple days, both at the single-cell and population levels. What are the mechanisms underlying this stable, heterogeneous representation? Based on the limited role of neuromodulatory inputs in wS1 and the decisive effect of glutamatergic inputs in

driving this spontaneous movement-dependent activity, we investigated the anatomical architecture of brain-wide glutamatergic and GABAergic presynaptic networks of two subsets of wS1 L2/3 PNs. These subsets exhibited a distinct pattern of activity in relation to spontaneous movements (WL & NM neurons). We found that individual PNs in superficial layers, regardless of their functional properties, receive highly converging inputs from most wS1-projecting brain areas, suggesting that individual cortical neurons have direct access to a broad range of information from diverse brain regions. Yet, functionally distinct cortical neurons showed anatomical biases in the proportions of specific long-range presynaptic inputs (Extended Data Fig. 15), suggesting that information from a given presynaptic area may be selectively amplified or reduced through the number of inputs. The brain-wide input connectivity rules of individual cortical neurons revealed in our study mirror the output projection rules of individual cortical neurons to other cortical areas<sup>48,49</sup>. We found highly convergent yet characteristic presynaptic connectivity patterns depending on the functional property of each neuron. In output connectivity studies, individual cortical neurons divergently project to a wide range of other cortical areas but with non-random patterns<sup>48,49</sup>.

WL neurons received a lower fraction of motor cortical inputs and a higher fraction of thalamic inputs relative to NM neurons. Moreover, we found a negative correlation between the modulation of neuronal activity by spontaneous movements and the fraction of motor cortical presynaptic cells and, conversely, a positive correlation between the modulation of neuronal activity by spontaneous movements and the fraction of thalamic presynaptic cells. In addition to an increased fraction of thalamic inputs converging onto WL neurons, we found that thalamic inputs directly contribute to the activity of PNs during spontaneous movements. A role for thalamic nuclei in driving behavioral-state dependent cortical activity is consistent with several earlier observations. First, robust manipulations of thalamic activity profoundly alter cortical state<sup>50,51</sup>. Second, thalamic nuclei activity correlates positively with spontaneous movements<sup>10,11,28,51-55</sup>, while the activity of neurons in cortical areas can fluctuate positively and negatively with spontaneous movements<sup>11</sup>. Third, thalamic inputs can drive L2/3 PNs more efficiently than cortical inputs<sup>56</sup>. However, that individual PNs encoding spontaneous movements have an enhanced thalamic input fraction could not have been predicted from previous studies.

Eliminating whisker movements through muscle paralysis, and therefore sensory feedback, did not disrupt spontaneous movement-dependent activity in wS1, strongly supporting the notion

that this activity is unlikely to be a direct consequence of sensory feedback<sup>50,55,57</sup>. Rather, movement-dependent activity in primary sensory cortices may serve as a local report of behavioral state and provide a self-referenced framework for binding information across cortical modules. Sensory thalamic nuclei neurons, as cortical neurons, are also active in the absence of sensory stimuli and feedback<sup>50</sup>. Even though neuromodulators co-fluctuate with behavioral state<sup>32,34,35,58,59</sup>, the effect of direct neuromodulatory inputs was rather modest on the sensitivity of cortical neurons to movement-related behavioral state. Instead, the subset of neurons that reliably tracked the behavioral state appeared to be driven by long-range glutamatergic inputs, particularly from the thalamus. Neuromodulators profoundly alter the thalamic activity mode, which can in turn affect the recipient cortex<sup>60-63</sup>. One possibility is that neuromodulators utilize strong thalamic connections to influence PNs that track behavioral state, rather than driving these neurons directly (Extended Data Fig. 15)<sup>60-63</sup>.

The finding that movement-encoding neurons receive a smaller fraction of inputs from motor cortical areas is somewhat perplexing given the general association of motor cortical areas with movement execution. Motor cortical areas have been shown to be required for learning and production of skilled and accurate movements<sup>64</sup>, rather than for the execution of innate movement sequences. Instead of being a learned motor skill, spontaneous whisking and locomotion accompanied by rhythmic whisking are innate behaviors and part of the whole range of coordinated movements that represents a behavioral state. While inactivation of wM1 affects wS1 activity, it does not abolish the behavioral state-dependent changes in S1 activity<sup>65</sup>. M1/2 axons in wS1 do not appear to be exclusively dedicated to transmitting movement features, but instead carry multiple aspects of sensorimotor behavior including touch<sup>27</sup>. The M1/2 pathway is known to alter cortical sensory responses through the engagement of a local disinhibitory circuit that changes stimulus response gain to relevant inputs<sup>66,67</sup>. One possibility is that the M1/2 pathway may be more relevant for sensorimotor learning in wS1, instead of determining behavioral state-dependent representations. If the role of these behavioral state-encoding neurons is to reliably update the behavioral state to the local network, one may expect that these neurons are less susceptible to the plasticity of sensorimotor learning.

Our study is based on the proportion of presynaptic cells, in different brain areas, of individual cortical neurons. While we focused on functionally testing the most salient input pathway revealed by our presynaptic network study (thalamic), other input pathways may also

play a significant role in driving postsynaptic activity. It is undetermined how the presynaptic proportions are related to the synaptic strength of inputs from a given brain area and whether the presynaptic cells are functionally similar. As an example, while we did not find differences in the input fraction and spatial organization of glutamatergic and GABAergic wS1 inputs, future studies are needed to fully characterize the functional organization of the local presynaptic inputs. This information will be critical to further understand the contribution of anatomical and functional presynaptic networks to the functional heterogeneous cortical neurons.

The enhanced thalamic input fraction of neurons that tracked behavioral state may arise during development, as suggested by the fact that early cortical activity is dominated by thalamic inputs triggered by spontaneous movements<sup>68-71</sup>. Whether the enhanced thalamic fraction of movement-encoding neurons observed in adults constitutes a developmental trace remains to be explored. Our results revealed anatomical biases in long-range glutamatergic inputs mapping onto functionally distinct neurons. These specific input patterns together with the stable representation uncovered here suggest the existence of preconfigured patterns of activity in S1 in the context of behavioral state<sup>72</sup>.

## References

- 1 Poulet, J. F. & Petersen, C. C. Internal brain state regulates membrane potential synchrony in barrel cortex of behaving mice. *Nature* **454**, 881-885 (2008).
- 2 Niell, C. M. & Stryker, M. P. Modulation of visual responses by behavioral state in mouse visual cortex. *Neuron* **65**, 472-479 (2010).
- 3 Keller, G. B., Bonhoeffer, T. & Hübner, M. Sensorimotor mismatch signals in primary visual cortex of the behaving mouse. *Neuron* **74**, 809-815 (2012).
- 4 Saleem, A. B., Ayaz, A., Jeffery, K. J., Harris, K. D. & Carandini, M. Integration of visual motion and locomotion in mouse visual cortex. *Nat Neurosci* **16**, 1864-1869 (2013).
- 5 Reimer, J. *et al.* Pupil fluctuations track fast switching of cortical states during quiet wakefulness. *Neuron* **84**, 355-362 (2014).
- 6 McGinley, M. J., David, S. V. & McCormick, D. A. Cortical Membrane Potential Signature of Optimal States for Sensory Signal Detection. *Neuron* **87**, 179-192 (2015).
- 7 Vinck, M., Batista-Brito, R., Knoblich, U. & Cardin, J. A. Arousal and locomotion make distinct contributions to cortical activity patterns and visual encoding. *Neuron* **86**, 740-754 (2015).
- 8 Ayaz, A. *et al.* Layer-specific integration of locomotion and sensory information in mouse barrel cortex. *Nat Commun* **10**, 2585 (2019).
- 9 Musall, S., Kaufman, M. T., Juavinett, A. L., Gluf, S. & Churchland, A. K. Single-trial neural dynamics are dominated by richly varied movements. *Nat Neurosci* **22**, 1677-1686 (2019).

- 10 Steinmetz, N. A., Zatzka-Haas, P., Carandini, M. & Harris, K. D. Distributed coding of choice, action and engagement across the mouse brain. *Nature* **576**, 266-273 (2019).
- 11 Stringer, C. *et al.* Spontaneous behaviors drive multidimensional, brainwide activity. *Science* **364**, 255, aav7893 (2019).
- 12 Zagha, E. *et al.* The Importance of Accounting for Movement When Relating Neuronal Activity to Sensory and Cognitive Processes. *J Neurosci* **42**, 1375-1382 (2022).
- 13 Jia, H., Rochefort, N. L., Chen, X. & Konnerth, A. Dendritic organization of sensory input to cortical neurons in vivo. *Nature* **464**, 1307-1312 (2010).
- 14 Ko, H. *et al.* Functional specificity of local synaptic connections in neocortical networks. *Nature* **473**, 87-91 (2011).
- 15 Cossell, L. *et al.* Functional organization of excitatory synaptic strength in primary visual cortex. *Nature* **518**, 399-403 (2015).
- 16 Wertz, A. *et al.* PRESYNAPTIC NETWORKS. Single-cell-initiated monosynaptic tracing reveals layer-specific cortical network modules. *Science* **349**, 70-74 (2015).
- 17 Lee, W. C. *et al.* Anatomy and function of an excitatory network in the visual cortex. *Nature* **532**, 370-374 (2016).
- 18 Iacaruso, M. F., Gasler, I. T. & Hofer, S. B. Synaptic organization of visual space in primary visual cortex. *Nature* **547**, 449-452 (2017).
- 19 Rossi, L. F., Harris, K. D. & Carandini, M. Spatial connectivity matches direction selectivity in visual cortex. *Nature* **588**, 648-652 (2020).
- 20 Scholl, B., Thomas, C. I., Ryan, M. A., Kamasawa, N. & Fitzpatrick, D. Cortical response selectivity derives from strength in numbers of synapses. *Nature* **590**, 111-114 (2021).
- 21 Weiler, S. *et al.* Orientation and direction tuning align with dendritic morphology and spatial connectivity in mouse visual cortex. *Curr Biol* **32**, 1743-1753 (2022).
- 22 Harris, K. D. & Mrsic-Flogel, T. D. Cortical connectivity and sensory coding. *Nature* **503**, 51-58 (2013).
- 23 Euston, D. R. & McNaughton, B. L. Apparent encoding of sequential context in rat medial prefrontal cortex is accounted for by behavioral variability. *J Neurosci* **26**, 13143-13155 (2006).
- 24 Peron, S. P., Freeman, J., Iyer, V., Guo, C. & Svoboda, K. A Cellular Resolution Map of Barrel Cortex Activity during Tactile Behavior. *Neuron* **86**, 783-799 (2015).
- 25 Allen, W. E. *et al.* Thirst regulates motivated behavior through modulation of brainwide neural population dynamics. *Science* **364**, 253, aav3932 (2019).
- 26 Buetfering, C. *et al.* Behaviorally relevant decision coding in primary somatosensory cortex neurons. *Nat Neurosci* **25**, 1225-1236 (2022).
- 27 Petreanu, L. *et al.* Activity in motor-sensory projections reveals distributed coding in somatosensation. *Nature* **489**, 299-303 (2012).
- 28 Roth, M. M. *et al.* Thalamic nuclei convey diverse contextual information to layer 1 of visual cortex. *Nat Neurosci* **19**, 299-307 (2016).
- 29 Constantinople, C. M. & Bruno, R. M. Effects and mechanisms of wakefulness on local cortical networks. *Neuron* **69**, 1061-1068 (2011).
- 30 Polack, P. O., Friedman, J. & Golshani, P. Cellular mechanisms of brain state-dependent gain modulation in visual cortex. *Nat Neurosci* **16**, 1331-1339 (2013).
- 31 Eggermann, E., Kremer, Y., Crochet, S. & Petersen, C. C. H. Cholinergic signals in mouse barrel cortex during active whisker sensing. *Cell Rep* **9**, 1654-1660 (2014).
- 32 Lee, A. M. *et al.* Identification of a brainstem circuit regulating visual cortical state in parallel with locomotion. *Neuron* **83**, 455-466 (2014).

- 33 Munoz, W. & Rudy, B. Spatiotemporal specificity in cholinergic control of neocortical function. *Curr Opin Neurobiol* **26**, 149-160 (2014).
- 34 Yang, H., Bari, B. A., Cohen, J. Y. & O'Connor, D. H. Locus coeruleus spiking differently correlates with S1 cortex activity and pupil diameter in a tactile detection task. *Elife* **10**, 64327 (2021).
- 35 Lohani, S. *et al.* Spatiotemporally heterogeneous coordination of cholinergic and neocortical activity. *Nat Neurosci* **25**, 1706-1713 (2022).
- 36 Oh, S. W. *et al.* A mesoscale connectome of the mouse brain. *Nature* **508**, 207-214 (2014).
- 37 Crochet, S., Poulet, J. F., Kremer, Y. & Petersen, C. C. Synaptic mechanisms underlying sparse coding of active touch. *Neuron* **69**, 1160-1175 (2011).
- 38 Wang, H. C., LeMessurier, A. M. & Feldman, D. E. Tuning instability of non-columnar neurons in the salt-and-pepper whisker map in somatosensory cortex. *Nat Commun* **13**, 6611 (2022).
- 39 Pérez-Ortega, J., Alejandre-García, T. & Yuste, R. Long-term stability of cortical ensembles. *Elife* **10**, 64449 (2021).
- 40 Judkewitz, B., Rizzi, M., Kitamura, K. & Häusser, M. Targeted single-cell electroporation of mammalian neurons in vivo. *Nat Protoc* **4**, 862-869 (2009).
- 41 Marshel, J. H., Mori, T., Nielsen, K. J. & Callaway, E. M. Targeting single neuronal networks for gene expression and cell labeling in vivo. *Neuron* **67**, 562-574 (2010).
- 42 Velez-Fort, M. *et al.* The stimulus selectivity and connectivity of layer six principal cells reveals cortical microcircuits underlying visual processing. *Neuron* **83**, 1431-1443 (2014).
- 43 Geiller, T. *et al.* Local circuit amplification of spatial selectivity in the hippocampus. *Nature* **601**, 105-109 (2022).
- 44 Callaway, E. M. & Luo, L. Monosynaptic Circuit Tracing with Glycoprotein-Deleted Rabies Viruses. *J Neurosci* **35**, 8979-8985 (2015).
- 45 DeNardo, L. A., Berns, D. S., DeLoach, K. & Luo, L. Connectivity of mouse somatosensory and prefrontal cortex examined with trans-synaptic tracing. *Nat Neurosci* **18**, 1687-1697 (2015).
- 46 Staiger, J. F. & Petersen, C. C. H. Neuronal Circuits in Barrel Cortex for Whisker Sensory Perception. *Physiol Rev* **101**, 353-415 (2021).
- 47 Naskar, S., Qi, J., Pereira, F., Gerfen, C. R. & Lee, S. Cell-type-specific recruitment of GABAergic interneurons in the primary somatosensory cortex by long-range inputs. *Cell Rep* **34**, 108774 (2021).
- 48 Han, Y. *et al.* The logic of single-cell projections from visual cortex. *Nature* **556**, 51-56 (2018).
- 49 Yamashita, T. *et al.* Diverse Long-Range Axonal Projections of Excitatory Layer 2/3 Neurons in Mouse Barrel Cortex. *Front Neuroanat* **12**, 33 (2018).
- 50 Poulet, J. F., Fernandez, L. M., Crochet, S. & Petersen, C. C. Thalamic control of cortical states. *Nat Neurosci* **15**, 370-372 (2012).
- 51 Nestvogel, D. B. & McCormick, D. A. Visual thalamocortical mechanisms of waking state-dependent activity and alpha oscillations. *Neuron* **110**, 120-138 e124 (2022).
- 52 Eriskien, S. *et al.* Effects of locomotion extend throughout the mouse early visual system. *Curr Biol* **24**, 2899-2907 (2014).
- 53 Moore, J. D., Mercer Lindsay, N., Deschênes, M. & Kleinfeld, D. Vibrissa Self-Motion and Touch Are Reliably Encoded along the Same Somatosensory Pathway from Brainstem through Thalamus. *PLoS Biol* **13**, e1002253 (2015).
- 54 Urbain, N. *et al.* Whisking-Related Changes in Neuronal Firing and Membrane Potential Dynamics in the Somatosensory Thalamus of Awake Mice. *Cell Rep* **13**, 647-656 (2015).
- 55 Petty, G. H., Kinnischtzke, A. K., Hong, Y. K. & Bruno, R. M. Effects of arousal and movement on secondary somatosensory and visual thalamus. *Elife* **10**, 67611 (2021).

- 56 Zhang, W. & Bruno, R. M. High-order thalamic inputs to primary somatosensory cortex are stronger and longer lasting than cortical inputs. *Elife* **8**, 44158 (2019).
- 57 Fee, M. S., Mitra, P. P. & Kleinfeld, D. Central versus peripheral determinants of patterned spike activity in rat vibrissa cortex during whisking. *J Neurophysiol* **78**, 1144-1149 (1997).
- 58 Berridge, C. W. & Waterhouse, B. D. The locus coeruleus-noradrenergic system: modulation of behavioral state and state-dependent cognitive processes. *Brain Res Brain Res Rev* **42**, 33-84 (2003).
- 59 Reimer, J. *et al.* Pupil fluctuations track rapid changes in adrenergic and cholinergic activity in cortex. *Nat Commun* **7**, 13289 (2016).
- 60 Steriade, M. Acetylcholine systems and rhythmic activities during the waking--sleep cycle. *Prog Brain Res* **145**, 179-196 (2004).
- 61 Hirata, A., Aguilar, J. & Castro-Alamancos, M. A. Noradrenergic activation amplifies bottom-up and top-down signal-to-noise ratios in sensory thalamus. *J Neurosci* **26**, 4426-4436 (2006).
- 62 Lee, S. H. & Dan, Y. Neuromodulation of brain states. *Neuron* **76**, 209-222 (2012).
- 63 McCormick, D. A., Nestvogel, D. B. & He, B. J. Neuromodulation of Brain State and Behavior. *Annu Rev Neurosci* **43**, 391-415 (2020).
- 64 Kawai, R. *et al.* Motor cortex is required for learning but not for executing a motor skill. *Neuron* **86**, 800-812 (2015).
- 65 Zagha, E., Casale, A. E., Sachdev, R. N., McGinley, M. J. & McCormick, D. A. Motor cortex feedback influences sensory processing by modulating network state. *Neuron* **79**, 567-578 (2013).
- 66 Lee, S., Kruglikov, I., Huang, Z. J., Fishell, G. & Rudy, B. A disinhibitory circuit mediates motor integration in the somatosensory cortex. *Nat Neurosci* **16**, 1662-1670 (2013).
- 67 Gasselin, C., Hohl, B., Vernet, A., Crochet, S. & Petersen, C. C. H. Cell-type-specific nicotinic input disinhibits mouse barrel cortex during active sensing. *Neuron* **109**, 778-787 (2021).
- 68 Khazipov, R. *et al.* Early motor activity drives spindle bursts in the developing somatosensory cortex. *Nature* **432**, 758-761 (2004).
- 69 Blumberg, M. S., Marques, H. G. & Iida, F. Twitching in sensorimotor development from sleeping rats to robots. *Curr Biol* **23**, R532-537 (2013).
- 70 Yang, J. W. *et al.* Thalamic network oscillations synchronize ontogenetic columns in the newborn rat barrel cortex. *Cereb Cortex* **23**, 1299-1316 (2013).
- 71 Inácio, A. R., Nasretidinov, A., Lebedeva, J. & Khazipov, R. Sensory feedback synchronizes motor and sensory neuronal networks in the neonatal rat spinal cord. *Nat Commun* **7**, 13060 (2016).
- 72 Buzsáki, G. & Mizuseki, K. The log-dynamic brain: how skewed distributions affect network operations. *Nat Rev Neurosci* **15**, 264-278 (2014).

## Methods

### Mice

All animal procedures were conducted in accordance with a protocol approved by the National Institutes of Health Animal Care and Use Committee and complied with Public Health Service policy on the humane care and use of laboratory animals. We used the following transgenic mouse lines: Emx1-IRES-Cre (JAX 005628)<sup>73</sup>, tetO-GCaMP6s (JAX 024742)<sup>74</sup>, and CaMK2a-tTA (JAX 007004)<sup>75</sup>. We performed experiments on 10 Emx1-IRES-Cre and 37 tetO-GCaMP6s;CaMK2a-tTA mice. We used both male and female mice (females, 45%), 12-23 weeks old at the experimental endpoint (last imaging session or perfusion for input tracing experiments). Mice were housed in groups, in individually ventilated and enriched laboratory cages, in climate-controlled rooms (T, 22 °C; humidity, 45%), under a reverse 12 h light - 12 h dark cycle (light on, 9 a.m.), and with *ad libitum* access to water and food. After surgical procedures, mice were housed individually. All experiments were performed in the dark phase of the cycle. Animals in test and control groups were littermates and randomly selected.

### Surgeries

All surgical procedures were performed stereotactically, including injection of recombinant adeno-associated viruses (rAAV), head plate implantation, and cranial window implantation, and were carried out under aseptic conditions. Mice were anesthetized with isoflurane (1.0 - 2.0% in O<sub>2</sub> at 0.8 L/min). The eyes were protected with ophthalmological ointment, and body temperature was maintained at ~37 °C using a heating pad (Stoelting). Dexamethasone (0.2 mg/Kg of body weight; subcutaneous injection) was administered at least 1 h prior to cranial window implantation, to prevent brain edema. Exposed dura mater was perfused with sterile Ringer's solution (in mM, 150 NaCl, 2.5 KCl, 10 HEPES, 2 CaCl<sub>2</sub>, 1 MgCl<sub>2</sub>; pH 7.3 adjusted with NaOH; 300 mOsm). After surgery, mice were treated with meloxicam (2 mg/Kg; subcutaneous injection) every 24 h for 3 days, to minimize pain and inflammation, and with enrofloxacin (0.1 mg/mL in drinking water) for 5 to 10 days, to prevent infection. Wellness and body weight were monitored daily for 10 days.

The first surgery consisted of rAAV injection followed by headpost implantation or headpost implantation only. For rAAV injection, at each target coordinate, the skull was thinned, and a craniotomy (~50 µm diameter) was made using fine forceps. A glass micropipette (5-10 µm outer diameter tip) attached to a nanoinjector (WPI) was used to deliver the viral vector (at 20-50

nL/min). After injection, the pipette was left in place for ~5 min before being slowly retracted. To express GCaMP6f in PNs, we injected rAAV5-Syn-Flex-GCaMP6f-WPRE-SV40 (Addgene 100833) in the right hemisphere wS1 of Emx1-IRES-Cre mice (in mm relative to Bregma: AP -0.80 and ML 3.50; AP -1.20 and ML 3.40, the pipette was angled at 21 °, and 30 nL were injected at the subdural depths of 350, 250 and 150 µm). For simultaneous imaging of L2/3 PNs and optogenetic suppression of thalamic terminals in wS1, we injected rAAV5-CAG-ArchT-tdTomato (UNC Vector Core AV4595B) or rAAV5-CAG-tdTomato (Addgene 59462) in the VPM (AP -1.70, ML 1.85, and DV 3.15; 50 nL) and POM (AP 2.00, ML 1.32, and DV 3.00; 50 nL) of tetO-GCaMP6s;CaMK2a-tTA mice. We implanted a custom-made Y-shaped titanium head plate using dental cement (Super-Bond C&B, Parkell). The exposed skull was covered with a thin layer of clear dental cement and, subsequently, opaque biocompatible silicone (Kwik-Cast, WPI). Mice recovered for at least 5 days following rAAV injection and/or headpost implantation. Thereafter, mice were familiarized with experimenter handling and head-fixation on top of a wheel. Mice required typically 3-4 days to express a preferred spontaneous movement repertoire, frequency, and duration (Fig. 1b-d).

In a second surgery, a craniotomy was made over the right hemisphere wS1 (centered at AP 1.1 and ML 3.3), and a glass cranial window (diameter, 3 mm; thickness, 100-150 µm) was placed and secured over the craniotomy using cyanoacrylate adhesive (3M) and dental cement. For in vivo neuropharmacological experiments and single neuron monosynaptic input tracing, the cranial window had a rectangular laser-cut opening (0.30 x 0.80 mm, Potomac Photonics, Fig. 2a) covered with transparent biocompatible silicone (Kwik-Sil, WPI)<sup>76</sup>. On the day of imaging, the silicone plug was removed and micro-durotomy was performed for direct access to the brain. Recordings were initiated after a minimum period of 5 weeks post-rAAV injection, for stable GCaMP6f or ArchT expression, and within 3 ± 1 days after cranial window implantation, for tissue recovery.

## Behavior

All behavioral experiments were performed in darkness. Under head-fixation, mice with all intact whiskers were free to run on a wheel. The mouse face and whiskers were video-recorded at 250 fps using a high-speed camera (acA2000-340kmNIR, Basler) and an 8 mm lens (LM8JC, Kowa), under infrared LED illumination (850 nm, Mightex). Image acquisition was controlled by

StreamPix (NorPix). The wheel (diameter, 15 cm; width; 5.5 cm) was set so that only forward movement was permitted, facilitating mouse familiarization with the setup. To extract locomotion speed, we used a 2500 CPR resolution motion encoder (260-N-R-01-S-2500-R-HV-1-S-SF-1-N, Model 260 Accu-Coder, Encoder) affixed to the wheel shaft. Motion encoder pulses were converted to speed using a counter and LabView software (National Instruments (NI)), for online visualization of speed. To synchronize behavioral and neuronal data, voltage signals from each video-frame exposure and wheel speed were digitized and recorded at 10 kHz through a data acquisition card (PCI-6052E, NI), using the Prairie View Interface (Bruker).

### **Unilateral mystacial pad paralysis**

In a subset of animals, the left mystacial pad was paralyzed through a local, subcutaneous injection of BTX (0.5 Units in 10 $\mu$ L, BOTOX), under isoflurane anesthesia.

### **Whisker stimulation**

Deflection of the left whiskers was achieved using a solenoid valve-controlled pole (diameter, 3 mm; length, 5 cm). To maximize contact with all whiskers, the pole was positioned in alignment with the mystacial pad, at an angle of  $\sim 65^\circ$  (distance between the mystacial pad and the pole during stimulation,  $\sim 5$  mm). Stimuli (trains of 28-49 stimuli; speed,  $\sim 600$  mm/s; duration, 50 or 250 ms; interval, 3-5 s) were produced and synchronized to behavioral and neuronal data using the Prairie View Interface (Bruker). To ensure that changes in neuronal activity related to whisker deflection could be isolated from changes in neuronal activity related to potential alterations in movements during deflection, recordings included trials of whisker deflections coupled with sound, as well as sound-only trials<sup>61</sup>. Neurons were classified as sensory stimulus-responsive if they responded exclusively during whisker deflections coupled with sound, but not during sound-only trials.

### ***In vivo* imaging and optogenetics**

Imaging was performed using a two-photon microscope (Ultima Investigator, Bruker) and a fs-pulse Ti:Sapphire laser (Mai Tai DeepSee, Spectra-Physics), tuned between 860 and 1040nm, for imaging of difference fluorescent proteins. The microscope was equipped with an 8 kHz resonant galvanometer and a water-immersion 16X objective (0.8 NA, Nikon) coupled to a 400  $\mu$ m-range,

Z-axis piezoelectric drive. GCaMP6 and RFP fluorescence signals were passed through a 525/70m or 595/50m filter, respectively. Fluorescence was detected and amplified using GaAsP PMTs (Hamamatsu) and a dual preamplifier, prior to digitization. For 2-PT  $\text{Ca}^{2+}$  imaging, we performed one session per day (recording time  $\sim 66 \pm 21$  min). Images (resolution, 512 x 512) were collected at  $\sim 30$  Hz, in single plane mode. FOVs ranged from 271 x 271  $\mu\text{m}$  (for functional identification of a neuron for subsequent electroporation) to 573 x 573  $\mu\text{m}$  (for characterization of neuronal patterns of activity) with an average excitation laser power of  $\sim 33$ -76 mW at the objective. For simultaneous 2-PT  $\text{Ca}^{2+}$  imaging and optogenetic inhibition of thalamic axon terminals, we used a collimated 625 nm LED beam (Prizmatix UHP-T-625-SR)<sup>77,78</sup>. The LED was on during the turnaround of the resonant galvanometer. Trains of 1 s-long pulses (25 pulses; interval, 5 s) were generated and synchronized to behavioral and neuronal data acquisition using the Prairie View Interface (Bruker). In a few instances, pulses larger than 1 s were tested (Fig 1d). A filter (FF02-617/73-25, Semrock) was used to narrow the LED spectrum, and a dichroic mirror (FF556-SDi01, Semrock) was used direct the LED light onto the brain tissue and pass GCaMP6 fluorescence signals onto the PMT. The average power of the LED was 10-40 mW at the objective.

### ***In vivo* neuropharmacology**

A durotomy ( $\sim 50$   $\mu\text{m}$ ) was made through the access port of the implanted cranial window, under isoflurane anesthesia (Fig. 2a). Mice were allowed to recover for  $\sim 30$  min prior to recordings. Following acquisition of baseline behavioral and neuronal activity data, Ringer's solution was replaced by Ringer's solution supplemented with pharmacological agents, and recordings were reinstated. Only data acquired 20 min or more after drug application were considered for analysis. We used a combination of atropine (1 mM) and mecamylamine (1 mM) to block ACh receptors, a combination of prazosin (1 mM) and propranolol (1mM) to block NE receptors, DNQX (1 mM) to block NMDA receptors, and a combination of DNQX and D-AP5 (2 mM) to block both NMDA and AMPA receptors. ACh, NE, or glutamate receptors (NMDA alone or NMDA and AMPA) were targeted on separate imaging sessions, 1-2 days apart. To test the effectiveness of drug diffusion into the imaging FOV, we applied TTX (10-100  $\mu\text{M}$ ) in the final recording session. We tracked the same FOV (at  $338 \pm 21$   $\mu\text{m}$  of depth), but we did not discard neurons that were not matched across sessions. Experiments in which TTX did not silence neuronal activity over the entire FOV within 15-20 min, indicative of limited drug diffusion, were excluded ( $n = 2$  mice).

### ***In vivo* single neuron monosynaptic input tracing**

After micro-durotomy, we performed two-photon  $\text{Ca}^{2+}$  imaging and selected a target neuron based on its activity profile across behavioral states. Classification of the target neuron as NM or WL was confirmed during post-hoc analysis. After imaging, the mouse was lightly anesthetized, and 2-PT guided electroporation of the target neuron was performed as described previously<sup>16,19,40</sup>. A glass pipette ( $14 \pm 1.5 \text{ M}\Omega$ ) was filled with intracellular solution (in mM, 130 K-gluconate, 6.3 KCl, 0.5 EGTA, 10 HEPES, 5  $\text{Na}_2$ -phosphocreatine, 4 Mg-ATP, 0.3 Na-GTP; pH 7.4 adjusted with KOH; 280-300 mOsm) supplemented with Alexa 594 hydrazide (50  $\mu\text{M}$ , A10442, Thermo Fisher Scientific) and two DNA plasmids (pAAV-EF1 $\alpha$ -mTagBFP-HA-T2A-mCherry-TVA-E2A-N2c, 0.15  $\mu\text{g}/\mu\text{L}$ ; pAAV-CAG-N2c, 0.05  $\mu\text{g}/\mu\text{L}$ ). The resistance of the pipette tip was monitored continuously (Axoporation 800A, Molecular Devices). Positive pressure was applied to the pipette (70 mBar), which was visually advanced through the durotomy, using a micromanipulator (PatchStar, Scientifica). Upon entering the cortex, the pressure was swiftly decreased (35 mBar). Then, within  $\sim 50$ -100  $\mu\text{m}$  from the target neuron the pressure was further decreased (15 mBar). The pipette was slowly advanced towards the soma of the target neuron, until the tip resistance increased by at least 20%. The pressure was released, and a train (100 Hz, 1 s) of electric pulses (-10 V, 0.5 ms) was applied (Axoporation 800A), after which the pipette was retracted. The electroporated neuron was imaged 20 min later to evaluate its survival. Thereafter, we injected G-deleted, envelope-A coated CVS-N2c RV carrying RFP (kindly provided by the Center for Neuroanatomy with Neurotropic Viruses) in the vicinity (within  $\sim 150 \mu\text{m}$ ) the electroporated neuron (rate, 30 nL/min)<sup>79</sup>. Then, the access port of the cranial window was sealed using biocompatible silicone. Survival and successful transfection of the electroporated neuron was monitored within 2-3 days after electroporation and up to the experimental endpoint. Structural, 2-PT z-stacks (1-5  $\mu\text{m}$ -steps; resolution, 512 x 512; FOV, 102 x 102 to 271 x 271  $\mu\text{m}$ ) including the imaging FOV and/or the target neuron were acquired before and after electroporation, to track individual cells volumetrically throughout the experiment. Local, wS1 presynaptic networks were followed structurally through 2-PT imaging of GCaMP6 and RFP (z-stacks, 1-5  $\mu\text{m}$ -steps; resolution, 512 x 512; FOV, 271 x 271 to 814 x 814  $\mu\text{m}$ ). For z-stack acquisition the average laser power was depth-adjusted linearly, at did not exceed 100-150 mW at the objective. Mice were sacrificed at day 11 ( $\pm 1.5$  days) following electroporation, and brains

were processed for ex vivo input tracing. Brains containing less than 100 presynaptic cells were excluded from analysis ( $n = 1$ ).

## Histology

Upon completion of recordings, mice were deeply anesthetized and perfused transcardially with 4% formaldehyde in PBS. Post-perfusion, brains were immersion-fixed in 4% formaldehyde in PBS for 2-3 h and then transferred to 30 % sucrose in PBS.

For input tracing experiments, whole brain free-floating sequential coronal sections (50  $\mu$ m-thick) were obtained using a microtome (SM2010R, Leica). Sections were rinsed 3 times in PBS, incubated in blocking solution (5% normal serum and 1% TritonX-100 in PBS) at room temperature (RT) for 1 h, and subsequently incubated in primary antibody solution (2% normal serum and 1% TritonX-100 in PBS) at 4 °C for 48 h. Primary antibodies were detected through incubation in secondary antibody solution (2% normal serum and 1% TritonX-100 in PBS) at RT for 2 h. We used the following primary and secondary antibodies and respective dilutions: anti-RFP 1:500 (600-901-379, Rockland); anti-GABA 1:500 (A2052, Sigma), IgY-Alexa Fluor 555 1:200 (A21437, Thermo Fisher Scientific); IgG-Alexa Fluor 647 1:200 (A21245, Thermo Fisher Scientific). Sections were rinsed in PBS and sequentially mounted on glass slides. Neuronal nuclei were revealed through a fluorescent Nissl stain (NeuroTrace 435/455, N21479, Thermo Fisher Scientific), after which sections were cover-slipped. Whole-brain serial sections were imaged using an epifluorescence illumination microscope (Axio Imager, Zeiss). Multiple z-stacks (10  $\mu$ m steps), covering each section in its entirety, were acquired using Neurolucida (MBF Bioscience). Z-stacks were aligned and collapsed onto a single image using Deep Focus (Neurolucida).

For all other experiments, brain sections were similarly generated and mounted, and neuronal nuclei were visualized either using fluorescent Nissl stain (NeuroTrace 435/455 or NeuroTrace 530/615, N21482, Thermo Fisher Scientific) or DAPI (Fluoromount-G mounting medium, Thermo Fisher Scientific). Entire sections were imaged using an Axio1 Scanner (Zeiss). FOV location within wS1 was confirmed either by targeted 2-PT laser microlesions (the laser beam was focused at a subdural depth of 200  $\mu$ m; 800 nm; 5-30 s;  $\sim 0.5$  W)<sup>80</sup> or fluorescent dye (DiI (42364, Sigma) or Fast Blue (17740, Polysciences)) injection at the experimental endpoint and ex vivo histological analysis. Tissue imaging and histological analysis were done blinded to the experimental groups.

## Defining behavioral events

Video recordings of face and whiskers were processed using a custom MATLAB routine. To detect WM, we first defined a region of interest (ROI) encompassing the left or right whiskers in an image that consisted of the s.d. of representative frames of each session. We then computed the absolute power of the spatial derivative of consecutive frames (WM trace). Both the WM and L speed traces were downsampled to 30 Hz, averaging the values acquired during a  $\text{Ca}^{2+}$  imaging frame. To detect behavioral events, the WM trace was baseline subtracted (10<sup>th</sup> percentile of the full trace) and normalized. We then applied a threshold to the WM trace (3 x minimum s.d., calculated using a 30 s sliding window). Detection was visually inspected for all sessions, and the threshold was adjusted when applicable (e.g., Fig. 1b). Then, local maxima were calculated, and peaks less than ~0.5 s apart were considered as part of a single event; the first peak was considered as onset and the last, as offset. Events with an integral value smaller than 20 (< 3% of the session time) were excluded from analysis. WM events were considered as WL when the maximum L speed was higher than 0.20 cm s<sup>-1</sup> and, conversely, as W when L speed did not exceed 0.20 cm s<sup>-1</sup>. For comparisons across animals, the raw WM trace was baseline subtracted and normalized to its maximum; for BTX experiments, across session data were normalized to maximum according to the first session.

## Processing of two-photon calcium images

Two-photon  $\text{Ca}^{2+}$  images were processed using Suite2p<sup>81</sup>, in Python, with default parameters, unless otherwise indicated. Following subtraction of neuropil (fixed scaling factor of 0.7) and baseline (calculated on filtered traces, using a gaussian kernel of width 20 and a sliding window of 60 s), fluorescence traces were deconvolved using non-negative spike deconvolution<sup>82</sup> with a fixed decay timescale of 0.7 s for GCaMP6f and 1.5 s for GCaMP6s. To make sure that only somatic traces were included in the analysis, ROIs were manually curated by an analyst blinded to the experimental group. Aligned image series were visually inspected to control for z-drifts; data showing z-drifts were excluded from analysis. Tracking of the same neurons across sessions was done semiautomatically using a MATLAB script. All analysis was based on deconvolved traces; for presentation purposes only, we used neuropil subtracted fluorescence traces normalized to the maximum (F), overlaid with deconvolved fluorescence traces normalized to the maximum

(F deconvolved), unless otherwise indicated.

To generate temporal raster plots (Fig. 1e), the activity of each neuron was averaged over ~0.5 bins, z-scored and smoothed using a 1 s moving average filter; individual neurons were sorted by the first principal component of neuronal activity.

## Decoding analysis

We trained a linear decoder to decode behavioral variables from neuronal activity. We minimized the ridge regression<sup>83</sup> objective function (Eq. 1)

$$\frac{1}{2} \|y - Xw\|_2^2 + \alpha \|w\|_2^2 \quad (1)$$

where  $y$  is the behavioral variable,  $X$  is the neuronal activity matrix,  $w$  is the weight vector, and  $\alpha$  is the ridge parameter (regularization). We normalized the behavior and neuronal activity by z-score for the cross-day recordings. We did not normalize the neural activity for the neuromodulatory experiments, as activity was recorded continuously on the same day. We excluded (shown in the figures) and included the rebound cells for the optogenetics sessions, and no substantial difference was found. We split the trials into training (75%) and test sets (25%). The weight vector was estimated on the training set, and the ridge parameter was selected by leave-one-out (LOO) cross-validation<sup>84</sup> on the training set.

We evaluated the decoding performance by the out-of-sample coefficient of determination ( $R^2$ ) (Eq. 2)<sup>83</sup>. Using the weight vector estimated from the training set, we decoded the behavioral variables on the test (held out) set within the same condition or session (referred as within) and the trials of other conditions or sessions (referred as across). Then, we calculate the out-of-sample  $R^2$  using the predicted and true values for within and across data. The out-of-sample  $R^2$  is not prone to overfitting and will not be inflated.

$$R^2 = 1 - \frac{\sum_i (y(i) - \hat{y}(i))^2}{\sum_i (y(i) - \bar{y})^2} \quad (2)$$

where  $(i)$  is the index of out-of-sample trials,  $\hat{y}(i) = X(i)\hat{w}$  and  $\hat{w}$  is the estimated weight vector<sup>712</sup> from the training set.

## Modulation of neuronal activity

Data were analyzed using MATLAB scripts. The activity (F deconvolved) of each neuron was aligned to the onset and offset of spontaneous movements, W and WL. Baseline and post-offset

activities refer to a 0.5 s window preceding movement onset and a 0.5 s window after movement offset, respectively. A neuron was considered as UM if its average activity during W and/or WL events was significantly higher than its average activity during baseline and/or significantly higher than its average activity post-event ( $P < 0.01$ , paired-sample  $t$ -test). Conversely, a neuron was considered DM if its average activity during W and/or WL events was significantly lower than its baseline and/or significantly lower than its post-event average activity ( $P < 0.01$ , paired-sample  $t$ -test). Otherwise, neurons were considered as NM. Modulation refers to the mean activity during movement minus the mean activity during baseline, averaged across spontaneous movements (W, WL, or both, as specified throughout the text).

Time-normalized PETHs were created by normalizing the data to match the average duration of WL events across animals. To compute the correlation ( $r$ , Pearson's linear correlation coefficient) between the activity of individual neurons and each behavioral variable, deconvolved fluorescent traces, and corresponding whisker movements and locomotion speed raw traces were binned (bin size,  $\sim 0.5$  s).

Sensory stimulus-responsive neurons were defined by a significantly higher average activity within a response window of 0.5 s after the onset of whisker stimulation (coupled with sound) vs. baseline ( $P < 0.01$  paired-sample  $t$ -test). We excluded cells that also responded to sound-only stimuli vs. baseline (paired-sample  $t$ -test,  $P < 0.01$ ). Baseline was calculated on a 0.5 s window preceding stimulus onset. Sensory stimulus-response magnitude refers to the mean activity during the response window minus the mean activity during baseline, averaged across all whisker stimulations.

For neuropharmacological experiments, the distribution of modulation values for each WL neuron in the presence of blockers was compared to that of baseline (prior to blocker application,  $t$ -test). Similarly, we compared the distribution of sensory stimulus-response magnitude values before and after blocker application for each sensory stimulus-responsive neuron ( $t$ -test).

For optogenetic experiments, neurons were classified as light modulated if their activity during the light pulse differed significantly from that of baseline (0.5 s window prior to light pulse onset). To ensure that neurons exhibited activity during the baseline period, only neurons that showed a F deconv. value higher than 3 during the baseline period were included in the analysis (average baseline F deconv. across all cells recorded for optogenetic experiments, 2.2). When generating average PETHs with baseline normalization, the statistical significance of the

difference between PETHs for the NM and WL populations was calculated at the original data sampling rate (~30Hz).

## **Whole-brain reconstruction, annotation, and registration**

To analyze the brain-wide distribution of presynaptic neurons, we adapted a previous pipeline<sup>85,86</sup>. To reconstruct a whole brain 3-dimensionally, individual section images were aligned using BrainMaker (MBF Bioscience). Brain-wide presynaptic neurons (RFP<sup>+</sup>) were automatically segmented using NeuroInfo (MBF Bioscience) and manually annotated according to brain area. Local, wS1 presynaptic neurons were manually annotated based on cortical layer location. Distinct layers were identified based on the characteristic depth-varying density of NeuroTrace<sup>+</sup> neurons. Presynaptic neurons within each layer were identified as glutamatergic (GABA<sup>-</sup>) or GABAergic (GABA<sup>+</sup>). To confirm the colocalization of RFP and GABA in, a subset of brains was re-imaged using a confocal microscope (z-stacks, 3  $\mu$ m steps, C2, Nikon). Identification of glutamatergic and GABAergic neurons was equivalent for the two different imaging methods. Each serially reconstructed brain was registered to the Allen Mouse Common Coordinate Framework, and brain-wide presynaptic neurons (RFP<sup>+</sup>) were automatically re-identified according to distinct anatomical structures. Reconstructions and registrations were conducted blindly. Manual identification was independently performed by two analysts (one analyst was blinded to the activity profiles of the postsynaptic neurons). All manual and automatic identifications were coherent (e.g., Extended Data Fig. 12).

## **Analysis of brain-wide presynaptic networks**

### Fine-scale spatial registration of wS1 presynaptic networks

Postsynaptic neurons did not survive until the experimental endpoint<sup>16</sup>. We used the center of mass of glutamatergic presynaptic networks in L2/3 to estimate the position of the postsynaptic neurons for all 22 subjects<sup>16</sup>, which were then averaged to construct a reference postsynaptic site on the Allen Mouse Common Coordinate Framework. From the brain atlas, we manually marked the boundaries of the cortical surface and performed surface triangulation. Using this triangulated cortical surface, we then estimated the surface's normal vector that goes through the reference postsynaptic site and serves as the reference normal vector. Individual wS1 presynaptic network of each subject was then rigidly aligned based on the position of the reference postsynaptic site

and orientation of the reference normal vector.

### Layer-by-layer horizontal flat projections

After the fine-scale registration, we concatenated all neurons from both NM and WL groups. Then we performed PCA on each layer of the presynaptic networks to obtain the population best-fitted plane. Corresponding neurons from the layer were then projected onto the best-fitted plane. We then performed a rigid parameterization and mapped the neurons to a two-dimensional coordinate system. The resulting parameterization of each layer from every subject with gaussian kernel-density estimation is visualized in Extended Figure 10.

### Statistical analysis of the group-wise spatial distribution difference

To explore whether there was any difference in the spatial pattern of presynaptic networks between NM and WL groups, we tested the null hypothesis of no spatial distribution difference between two groups. We chose the 2-Wasserstein distance function as the test statistics<sup>87,88</sup>, and we performed a randomization test (N=10000) to approximate the permutation distribution. Due to the variability of total number of presynaptic neurons across brains, we introduced non-uniform sample weights when we computed the 2-Wasserstein distance to avoid any dominated effect from subjects having a large number of presynaptic neurons. Specifically, we first re-weighted every neuron by the inverse of the number of (layer-wise/whole-wise) presynaptic neurons to ensure an equivalent contribution from subjects with non-empty neuron sets. Second, sample weights from subjects in the same group were concatenated and normalized into a probabilistic mass. This alleviates the imbalance of group-wise total mass if some of the subjects have no neurons detected in specific cortical layers (for instance, GABAergic presynaptic neurons in Layer 6).

### **Statistics**

We did not use statistical methods to determine sample size. Data were presented as mean $\pm$ s.d. throughout the text. In box plots, the central line represents the median, the box represents the 25<sup>th</sup> and 75<sup>th</sup> percentiles, and the whiskers extend to the most extreme data points excluding outliers (larger than 1.5 x the interquartile range); when overlaid with individual datapoints, all datapoints, including outliers, were graphed. Statistical tests used were indicated in the figure legends. All comparisons using two-sample or paired-sample *t*-tests, Wilcoxon rank-sum or signed

rank tests were two-sided unless otherwise indicated. Bonferroni correction was applied to the alpha level during multiple comparisons.  $P$  values are indicated as: NS,  $P \geq 0.05$ ; \*,  $P < 0.05$ ; \*\*,  $P < 0.01$ ; \*\*\*,  $P < 0.001$ . Analytical routines and statistical tests were established using a subset of the data, and these were applied to entire datasets.

## Data availability

The datasets are available from the corresponding authors upon reasonable request.

## Code availability

The custom codes used for analyses have not been deposited in a public repository but are available from the corresponding authors upon reasonable request.

## Methods references

- 73 Gorski, J. A. *et al.* Cortical excitatory neurons and glia, but not GABAergic neurons, are produced in the Emx1-expressing lineage. *J Neurosci* **22**, 6309-6314 (2002).
- 74 Wekselblatt, J. B., Flister, E. D., Piscopo, D. M. & Niell, C. M. Large-scale imaging of cortical dynamics during sensory perception and behavior. *J Neurophysiol* **115**, 2852-2866 (2016).
- 75 Mayford, M. *et al.* Control of memory formation through regulated expression of a CaMKII transgene. *Science* **274**, 1678-1683 (1996).
- 76 Roome, C. J. & Kuhn, B. Chronic cranial window with access port for repeated cellular manipulations, drug application, and electrophysiology. *Front Cell Neurosci* **8**, 379, doi:10.3389/fncel.2014.00379 (2014).
- 77 Turi, G. F. *et al.* Vasoactive Intestinal Polypeptide-Expressing Interneurons in the Hippocampus Support Goal-Oriented Spatial Learning. *Neuron* **101**, 1150-1165 (2019).
- 78 Kaufman, A. M., Geiller, T. & Losonczy, A. A Role for the Locus Coeruleus in Hippocampal CA1 Place Cell Reorganization during Spatial Reward Learning. *Neuron* **105**, 1018-1026 (2020).
- 79 Reardon, T. R. *et al.* Rabies Virus CVS-N2c( $\Delta$ G) Strain Enhances Retrograde Synaptic Transfer and Neuronal Viability. *Neuron* **89**, 711-724 (2016).
- 80 Ryan, L. *et al.* Columnar Lesions in Barrel Cortex Persistently Degrade Object Location Discrimination Performance. *eNeuro* **9**, 0393-22 (2022).
- 81 Pachitariu, M. *et al.* Suite2p: beyond 10,000 neurons with standard two-photon microscopy. *bioRxiv*, 061507 (2017).
- 82 Friedrich, J., Zhou, P. & Paninski, L. Fast online deconvolution of calcium imaging data. *PLoS Comput Biol* **13**, e1005423 (2017).
- 83 Hastie, T., Tibshirani, R., Friedman, J. *The Elements of Statistical Learning: Data Mining, Inference, and Prediction, Second Edition.* (Springer New York, NY, 2009).
- 84 Pedregosa, F. *et al.* Scikit-learn: Machine Learning in Python. *Journal of Machine Learning Research* **12**, 2825-2830 (2011).

- 85 Hooks, B. M. *et al.* Topographic precision in sensory and motor corticostriatal projections varies across cell type and cortical area. *Nat Commun* **9**, 3549 (2018).
- 86 Eastwood, B. S. *et al.* Whole mouse brain reconstruction and registration to a reference atlas with standard histochemical processing of coronal sections. *J Comp Neurol* **527**, 2170-2178 (2019).
- 87 Villani, C. *Topics in optimal transportation.*, Vol. 58 (American Mathematical Society, 2021).
- 88 Flamary, R. *et al.* POT Python Optimal Transport library. *Journal of Machine Learning Research* **22**, 1–8 (2021).

## **Acknowledgements**

We thank all members of the S. Lee lab, the C. McBain lab, the T. Petros lab, and the W. Lu lab for helpful discussions; J. Qi, W. Zhang for technical assistance with genotyping and histology; R. Paletzki for assistance with processing of whole-brain histological images; the NIMH Section on Instrumentation (G. Dold, D. Ide, and T. Talbot) and the NIH IDEAS lab (L. Argueta, J. Krynitsky, T. Pohida) for providing custom hardware and software for data acquisition; the NIMH Systems Neuroscience Imaging Resource (J. Kuo, T. Usdin, S. Williams) for assistance with histological analyses; the NIMH Rodent Behavioral Core (Y. Chudasama) for providing surgical setups. We thank the Center for Neuroanatomy with Neurotropic Viruses for kindly providing CVS-N2c RV. We thank C.I. Baker, G. Fishell, R. Khazipov, D. Leopold, E. Merriam, B. Rudy, and P.E. Rueda-Orozco for suggestions on the manuscript. This work was supported by the Intramural Research Program of the National Institute of Mental Health, National Institutes of Health (ZIAMH002959).

## **Author contributions**

A.I. and S.L. conceived the study and designed the experiments. A.I. performed the experiments. A.I., K.C.L., Y.Z., F.P., C.R.G. and S.L. analyzed the data. A.I. and S.L. wrote the manuscript, with inputs from K.C.L., Y.Z., F.P., and C.R.G.

## **Competing interests**

The authors declare that no competing interests exist.

## Extended data

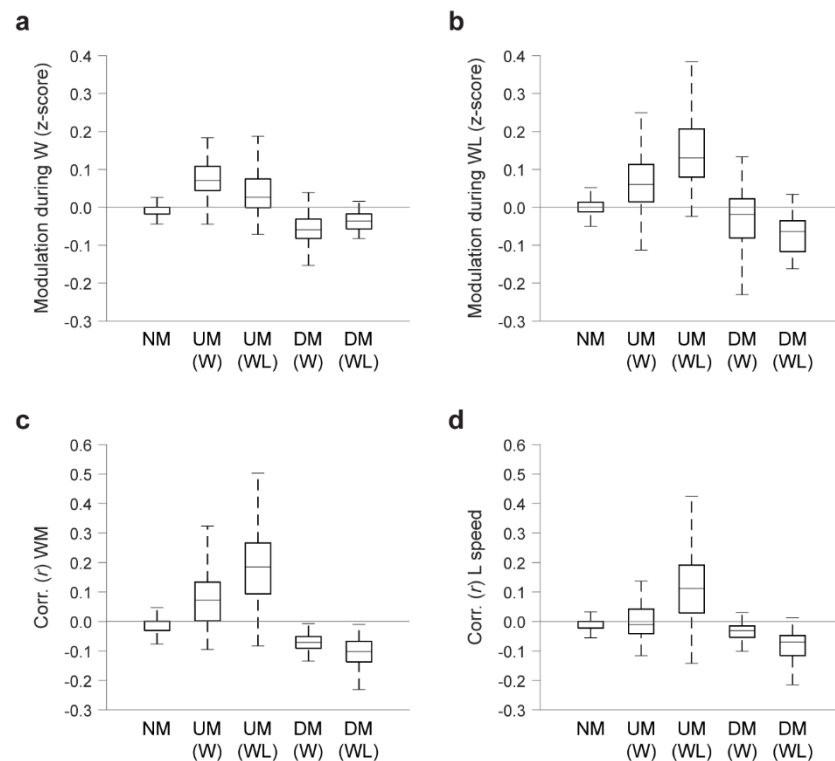

**Extended Data Fig. 1: Classification of individual neurons based on spontaneous movements.** **a-d**, To increase classification accuracy, spontaneous movements were subdivided into two subtypes, whisking without locomotion (W) and whisking with locomotion (WL). Neurons were considered upmodulated (UM) or (DM) if their activity changed significantly during either movement subtype, and all other neurons were considered as non-modulated (NM), resulting in 5 main subsets: NM, UM (W; WL) and DM (W; WL). Neurons exhibiting a significant increase or decrease in activity across both spontaneous movement subtypes were included in the UM (WL) or DM (WL) subsets, respectively. Neurons exhibiting opposite changes in activity for W and WL were rare ( $0.7 \pm 0.2\%$ ) and were not considered for further analysis. Note that UM (WL) neurons constitute the most robustly modulated subset during spontaneous movements. These neurons, particularly sensitive to spontaneous movements, were targeted for single-cell based input tracing, and are referred throughout the text simply as WL. **a-b**, Modulation (i.e., change in activity during spontaneous movements relative to baseline, prior to movement onset) of neurons classified as NM (715), UM (W, 62; WL, 224), and DM (W, 85; WL, 38) during spontaneous movements (6 FOVs, 6 sessions, 5 mice). **a**, Modulation of all subsets during W ( $263 \pm 98$  events per session). **b**, Modulation of all subsets during WL ( $50 \pm 27$  events per session). **c-d**, Correlation ( $r$ ) of NM, UM (W; WL), and DM (W; WL) neurons with each spontaneous movement variable. **c**, WM, whisker movements. **d**, L, locomotion. Modulation and correlation values are largely coherent.



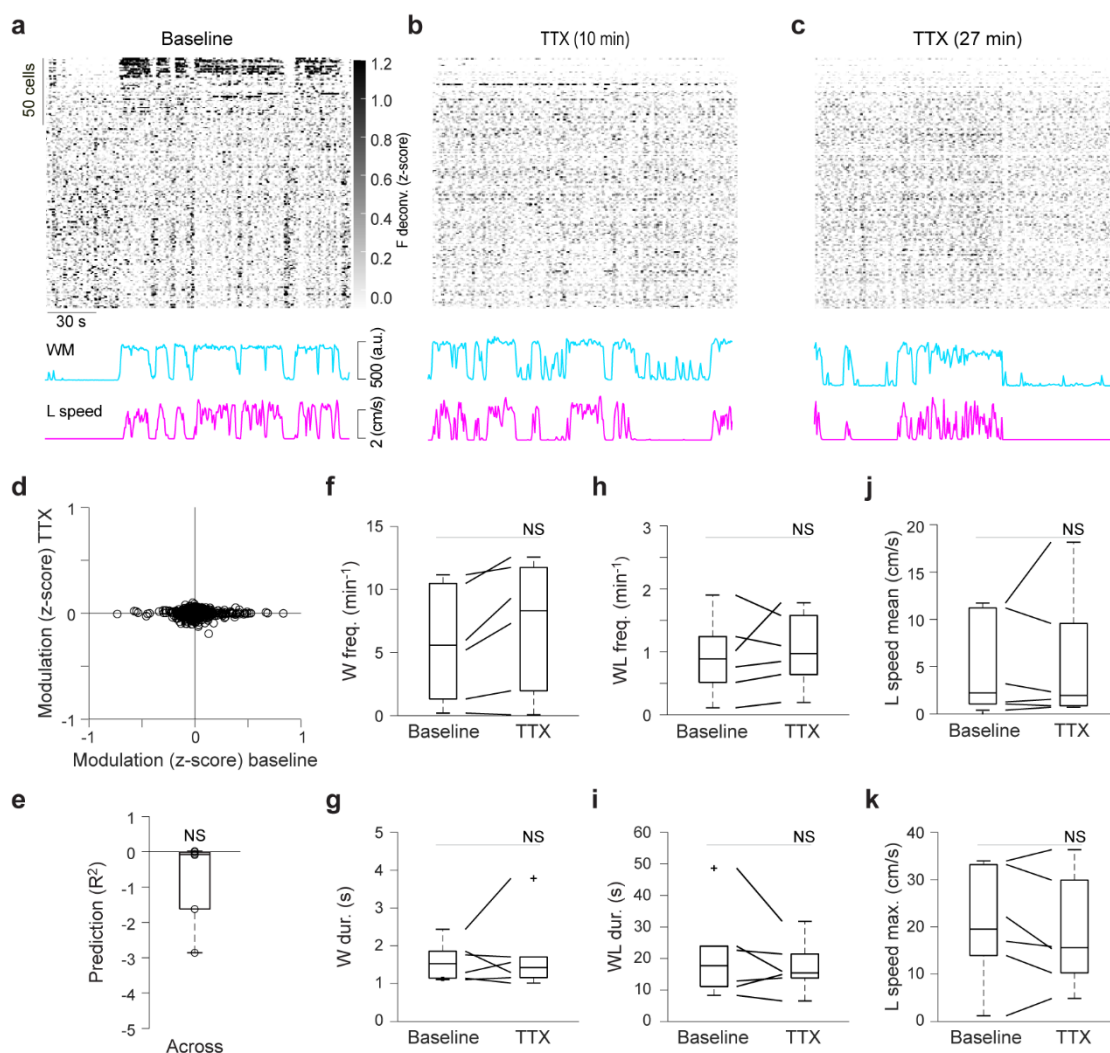

**Extended Data Fig. 3: Suppression of cortical activity by TTX diffusion into the brain parenchyma using a custom cranial window.** **a-c**, Top, example raster plots of neuronal activity, before and at different time points after application of TTX. Individual neurons (184) are sorted from top to bottom by decreasing weight on the first principal component. Bottom, corresponding whisker movements (WM) and locomotion (L) speed traces. **d**, Modulation of individual neurons (1021) during spontaneous movements (W and WL) before vs after application of TTX ( $P > 0.05$ , regression). **e**, Prediction of WM from population activity. Linear decoder predictive  $R^2$ ; the decoder was built using baseline data and evaluated on TTX out-of-sample data ( $P > 0.05$ , Wilcoxon signed-rank test, across  $R^2 \leq 0$  vs  $R^2 > 0$ ). **f-k**, Spontaneous movement parameters, W frequency (**f**), W duration (**g**), WL frequency (**h**), WL duration (**i**), mean locomotion speed (**j**) and maximum locomotion speed (**k**) before and after application of TTX for individual animals ( $P > 0.05$  for all panels, Wilcoxon signed-rank test,  $n = 6$  sessions, 6 animals).

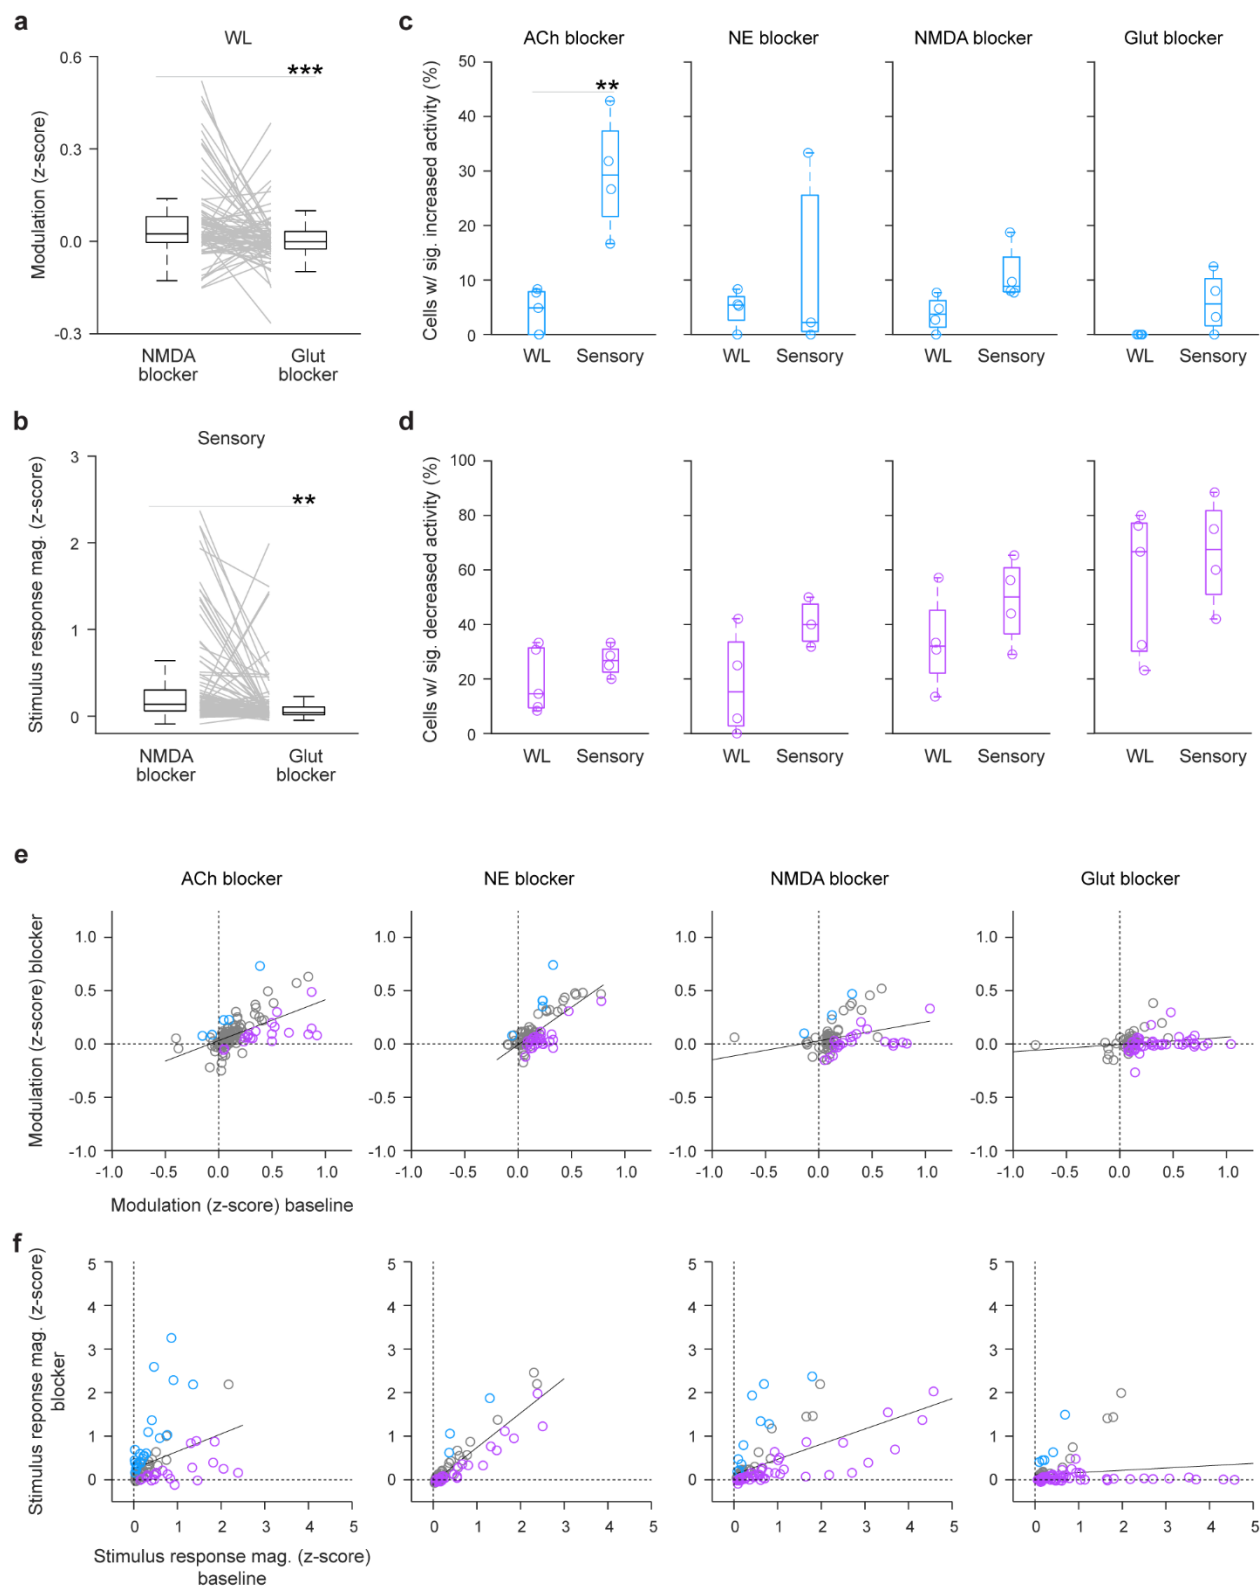

**Extended Data Fig. 4: Effect of neuromodulatory inputs on the activity of wS1 L2/3 PNs.** **a**, Modulation of individual WL neurons (77) during spontaneous movements (WL) in the presence of an NMDA-R blocker and in the presence of both NMDA-R

and AMPA-R blockers ( $P < 0.001$ , Wilcoxon signed-rank test). Neurons were defined as WL or stimulus-responsive based on data acquired prior to antagonist application. Glut, combined NMDA and AMPA receptors. **b**, Sensory stimulus-response magnitude of individual stimulus-responsive neurons (98) in the presence of an NMDA-R blocker and in the presence of both NMDA-R and AMPA-R blockers ( $P < 0.001$ , Wilcoxon signed-rank test). Only neurons showing an increased activity following stimulus presentation were included. **c**, Fraction of WL neurons that exhibited a significant increase in modulation during WL, and fraction of sensory stimulus-responsive neurons that exhibited a significant increase in stimulus response magnitude in the presence of either ACh ( $n = 6$  sessions, 6 animals), NE ( $n = 3-4$  sessions, 3-4 animals), NMDA ( $n = 4$  sessions, 4 animals) or NMDA-R and AMPA-R ( $n = 4-5$  sessions, 4-5 animals) blockers vs. baseline. **d**, Equivalent to **c**, but for WL and sensory neurons showing a decreased activity. **e**, Modulation of individual WL neurons (77-132) during spontaneous movements (WL) in the presence of the different blockers vs. baseline (ACh-R and NE-R blockade,  $P < 0.001$ ; NMDA-R,  $P < 0.01$ ; glut,  $P < 0.05$ , regression). Purple, cells showing a significant increase. Blue, cells showing significant decrease. **f**, Stimulus response magnitude for individual stimulus-responsive neurons (73-98) in the presence of the different blockers vs baseline (ACh-R, NE-R, and NMDA-R blockade,  $P < 0.001$ ; NMDA-R and AMPA-R,  $P > 0.05$ , regression). The effect of neuromodulatory input blockade, in particular ACh, is more robust is at the level of responses to sensory stimuli.

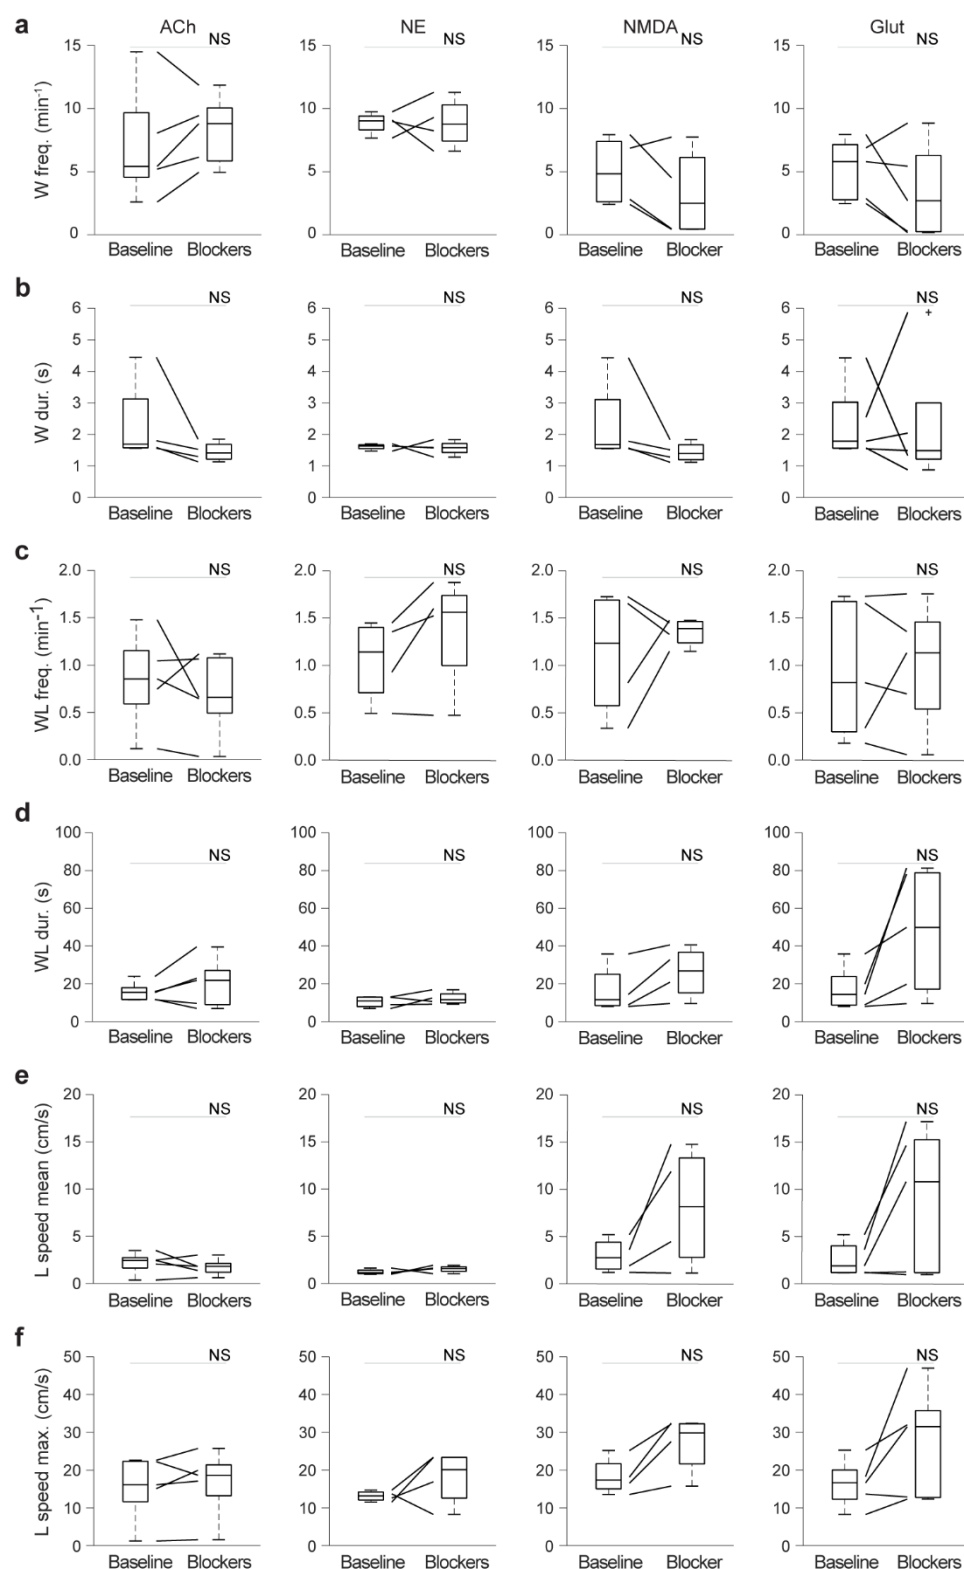

**Extended Data Fig. 5: Effect of neuromodulatory and glutamatergic receptor blockade on spontaneous movements. a-f,** Spontaneous movement parameters, W frequency (a), W duration (b), WL frequency (c), WL duration (d), mean locomotion speed

(e) and maximum locomotion speed (f) prior to (baseline) and during ACh, NE, NMDA or NMDA and AMPA receptor blockade ( $P > 0.05$  for all panels, Wilcoxon signed-rank test,  $n = 4-6$  sessions, 4-6 animals). L, locomotion. Glut, combined NMDA and AMPA receptors.

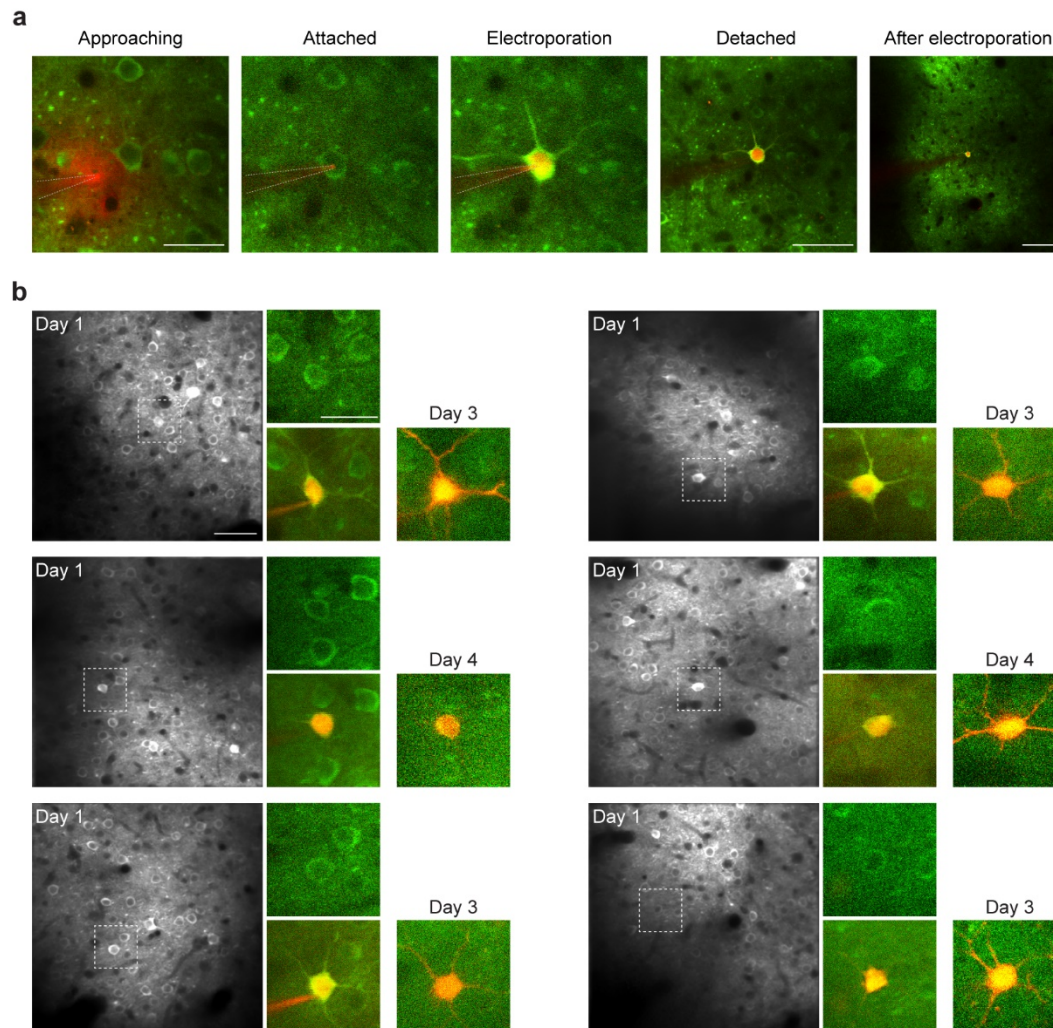

**Extended Data Fig. 6: Electroporation of a single, functionally defined neuron per brain.** **a**, Left to right, Example 2-PT guided approach of a PN in wS1 L2/3 with a pipette containing intracellular solution, Alexa 594 (red) and DNA (for TVA, G, and mCherry). Principal neurons express GCaMP6 (green). The 2-PT laser excitation wavelength is 860 nm, which allows imaging both GCaMP6 and Alexa 594. The pipette tip is advanced against the cell body until resistance increases by at least 20%, and positive pressure applied to the pipette is then gently released. Once the pipette tip establishes stable contact with the cell body, an electric pulse is applied, for electroporation, followed by gentle retraction of the pipette. Electroporation is indicated by the entry of Alexa 594 into the target cell. Only one pulse is applied per brain. Images of the brain and target neuron at different magnifications. Scale bars, from left to right, 25, 50, and 100  $\mu\text{m}$ . **b**, Example postsynaptic neurons. Left, Imaging FOV. Scale bar, 50  $\mu\text{m}$ . Middle, high magnification 2-PT images of the postsynaptic neuron before and immediately after (detached pipette) electroporation. Right, Image of the target neuron 3-4 days after electroporation (GCaMP6s<sup>+</sup>/mCherry<sup>+</sup>). Scale bar, 25  $\mu\text{m}$ .

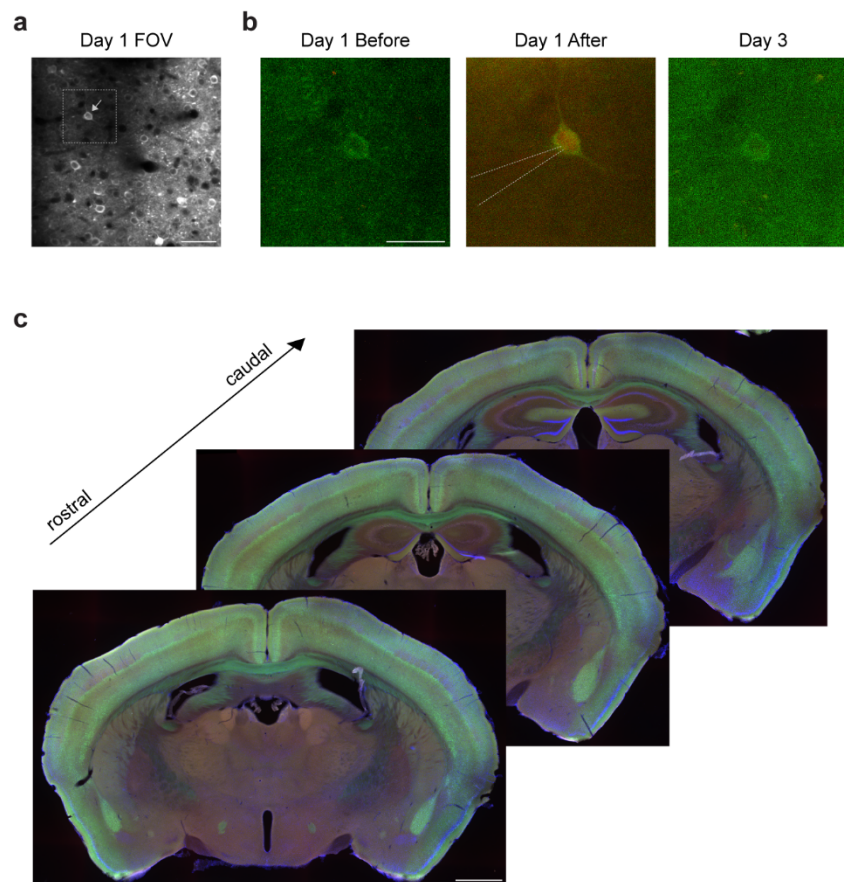

**Extended Data Fig. 7: Absence of presynaptic labelling in sham single-cell based monosynaptic input tracing experiments.**

**a**, Imaging FOV (session mean) for an example single-cell based monosynaptic retrograde tracing experiment. The arrow indicates a cell selected for electroporation based on its modulation during spontaneous movements. Scale bar, 50  $\mu$ m. **b**, Day 1, target cell (as indicated in **a**) before and after 2-PT guided electroporation with Alexa594 and DNA (TVA, G, and mCherry). Note the entry of Alexa 594 into the target cell (red). Following electroporation, RV-RFP were injected close to the electroporated cell. Day 3, the target cell did not express the reporter protein mCherry, indicative of a failed transfection. Note that we used a single plasmid encoding for TVA, G, and mCherry. Scale bar, 25  $\mu$ m. **c**, Histological analysis of the example experiment (**a-b**). Scale bar, 1 mm. We did not observe the emergence of a presynaptic cells ( $n = 4$  brains). In a separate mouse, we implanted a custom cranial window, and we injected RV-RFP through the access port without electroporation to test off-target effect of RV (control injection). Also in this case, we did not observe the emergence of a presynaptic cells. Red, RFP. Green, GCaMP6s. Blue, NeuroTrace 435/455.

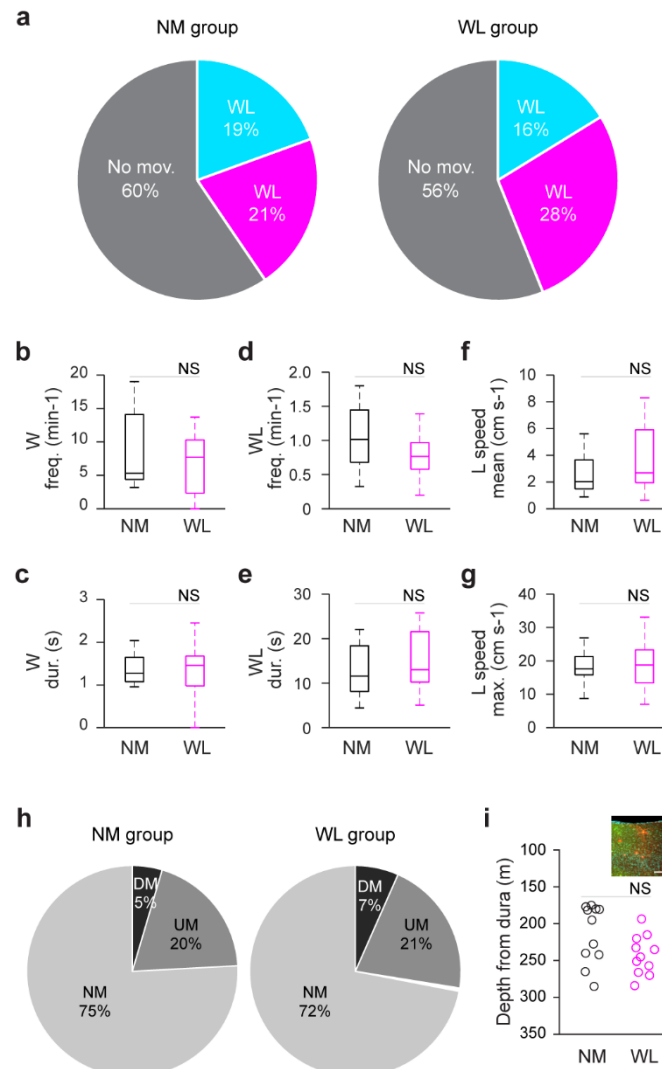

**Extended Data Fig. 8: Spontaneous movement and neuronal properties of the NM and WL groups for monosynaptic input tracing.** **a-g**, Analysis of spontaneous movements in mice of the NM ( $n = 11$ ) and WL ( $n = 11$ ) postsynaptic neuron groups. **a**, Pie chart of time spent per spontaneous movement type (W, WL) and not moving ( $P > 0.05$  for NM and WL groups, 2-way ANOVA). **b-g**, Spontaneous movement parameters, W frequency (**b**), W duration (**c**), WL frequency (**d**), WL duration (**e**), mean locomotion speed (**f**) and maximum locomotion speed (**g**) ( $P > 0.05$  for all panels). L, locomotion. **h**, Fraction of NM, DM, and UM neurons per group ( $P > 0.05$  for NM and WL groups, 2-way ANOVA). **i**, Cortical depth of each postsynaptic neuron. Depth was estimated starting from dura matter through in vivo 2-PT structural imaging ( $P > 0.05$ , Wilcoxon rank-sum test). Inset, epifluorescence image of a coronal brain slice encompassing wS1 and example postsynaptic neuron expressing both a red and green fluorescent protein (arrow). Red, RFP. Green, GCaMP6s/GFP. Cyan, DAPI. Scale bar, 100  $\mu\text{m}$ .

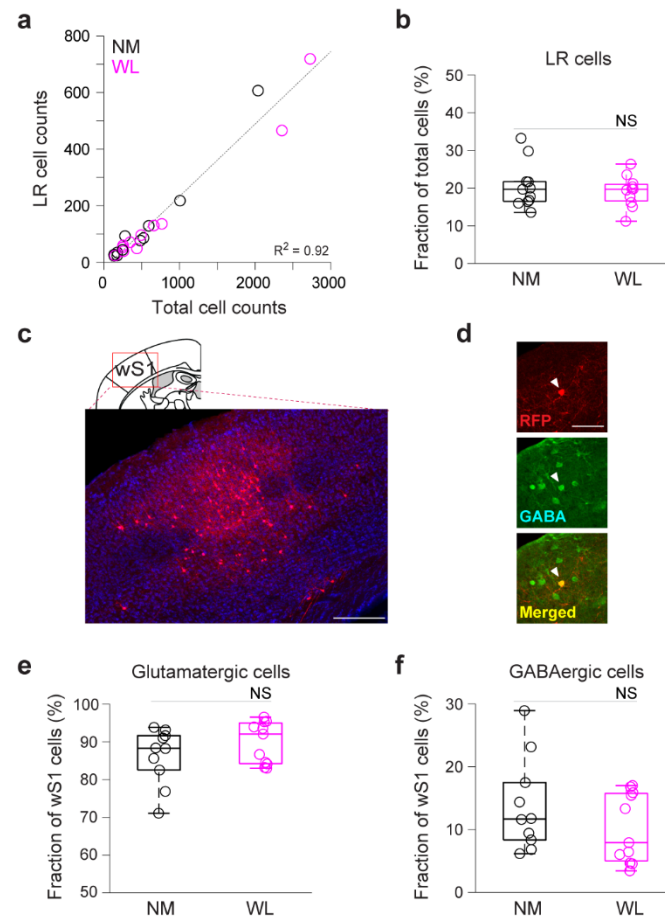

**Extended Data Fig. 9: Long-range and local glutamatergic and GABAergic presynaptic neurons per brain.** **a**, Number of long-range (LR) vs. total presynaptic neurons per brain ( $P < 0.001$ , regression). Black circles, NM presynaptic neuron group ( $n = 11$ ). Magenta circles, WL postsynaptic neuron group ( $n = 11$ ). **b**, Long-range presynaptic neurons as fraction of total presynaptic neurons ( $P > 0.05$ , randomization test). **c**, Epifluorescence image of a coronal brain slice, wS1 (example presynaptic network included in Fig. 3a, d). Note the “hourglass” distribution of RFP<sup>+</sup> presynaptic neurons across cortical layers 2/3, 4, and 5. Scale bar, 250  $\mu\text{m}$ . **d**, Images denoting the co-localization of RFP (presynaptic neurons, Alexa 555, red) and GABA (GABAergic cells, Alexa 647, represented in green) in wS1. Scale bar, 50  $\mu\text{m}$ . **e-f**, Glutamatergic (**e**) and GABAergic (**f**) presynaptic neurons as fraction of wS1 presynaptic neurons ( $n = 10$  NM and 11 WL,  $P > 0.05$  for both panels, randomization tests).

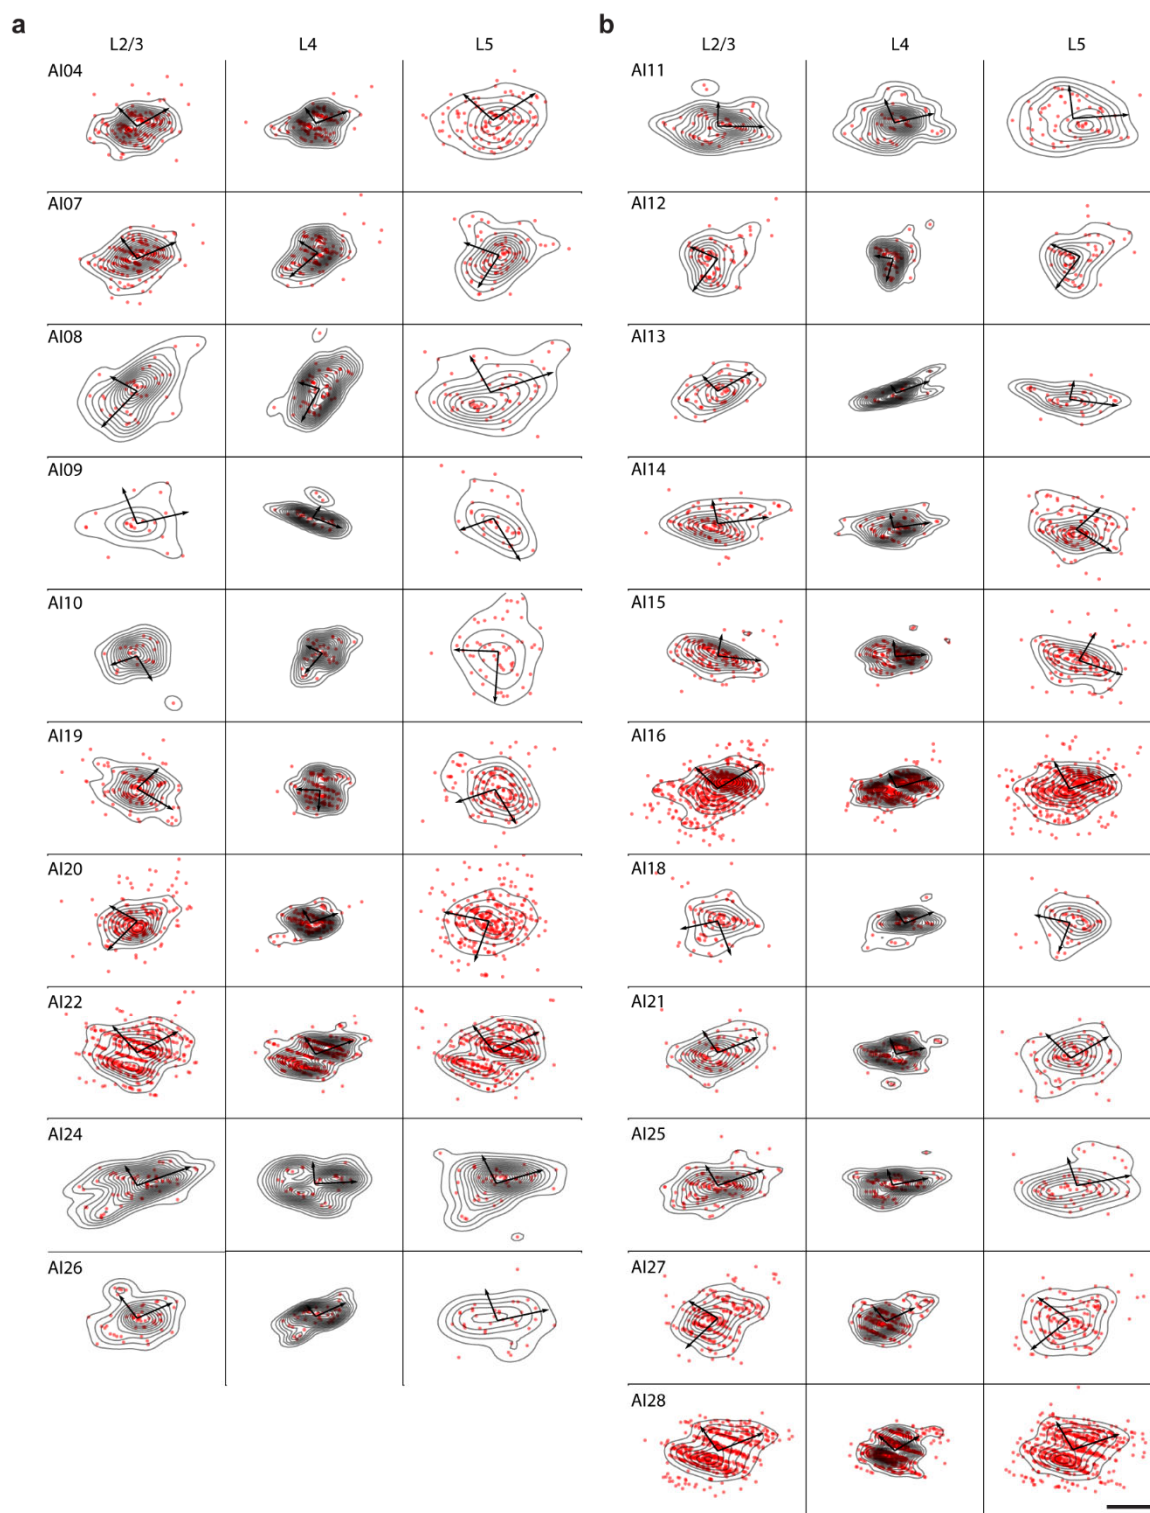

**Extended Data Fig. 10: Spatial distribution of individual local glutamatergic presynaptic networks.** Layer-by-layer horizontal flat projections of individual wS1 glutamatergic presynaptic networks with gaussian kernel Density estimation. We use the determinant of the estimated covariance as a measure of presynaptic networks dispersion. Smaller spatial dispersion of glutamatergic presynaptic cells in L4, than in L2/3 ( $P < 0.0001$ ) and L5 ( $P < 0.0001$ ) for all brains, independently of group (NM

and WL, one-sided *t*-test).. **a**, NM postsynaptic group. **b**, WL postsynaptic group. Scale bar, 500  $\mu$ m.

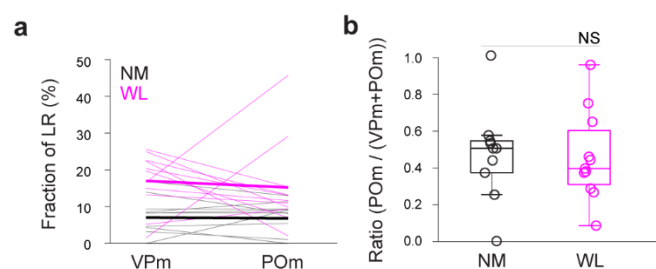

**Extended Data Fig. 11: Thalamic (VPM and POM) presynaptic networks.** **a**, VPM and POM presynaptic neurons as fraction of long-range presynaptic neurons (NM vs. WL,  $P < 0.05$ , Wilcoxon rank-sum test). Black, NM neuron group. Magenta, WL neuron group. Thin lines, individual data points. Thick lines, mean. **b**, Relative proportion of POM vs. VPM neurons ( $P > 0.05$ , Wilcoxon rank-sum test).

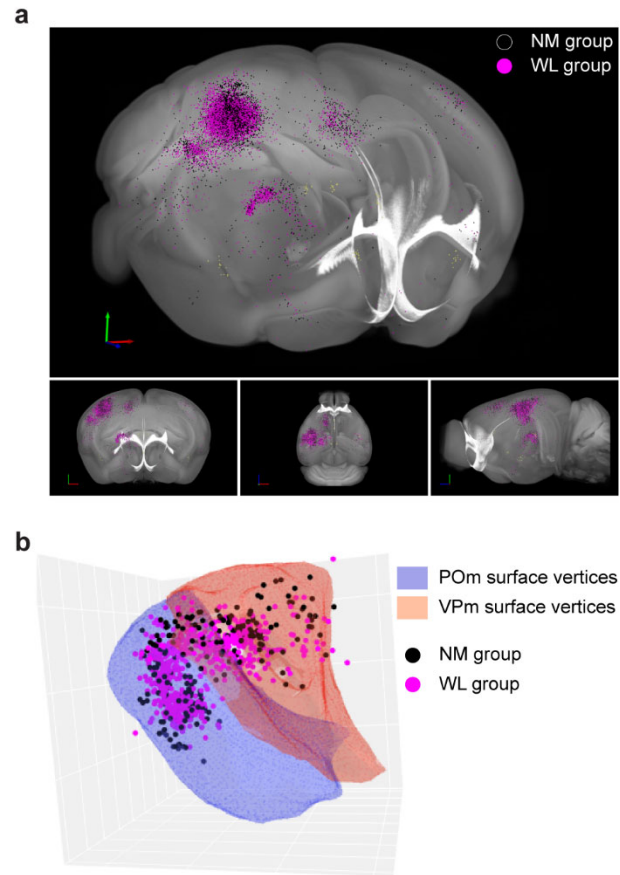

**Extended Data Fig. 12: Brain-wide spatial distribution of presynaptic networks.** **a**, Presynaptic networks of the NM ( $n = 5801$ , 11 networks, black) and WL ( $n = 8699$ , 11 networks, magenta) groups superimposed on the Allen Mouse Common Coordinate Framework, denoting the high degree of spatial overlap of presynaptic neurons from both groups ( $P > 0.05$  for each long-range area analyzed, S2, M1/2, sensory cortices, thalamus, contralateral wS1, PrhCtx, and BF, randomization test on 2-Wasserstein distance). **b**, Three-dimensional distribution of presynaptic neurons within sensory thalamic nuclei, VPm and POm, the main source of thalamic inputs to individual wS1 L2/3 PNs. We did not find evidence for a spatial bias in the distribution of presynaptic neurons of NM or WL neurons across the sensory thalamus ( $P > 0.05$ , randomization test).

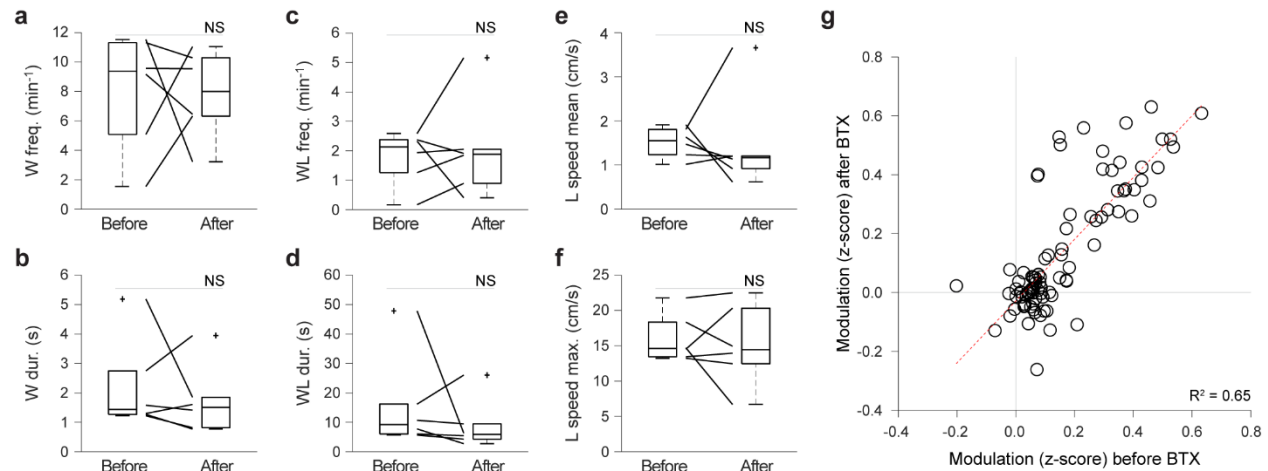

**Extended Data Fig. 13: Neuronal activity and spontaneous movement before and after mystacial pad paralysis.** a-f, Spontaneous movement parameters, W frequency (a), W duration (b), WL frequency (c), WL duration (d), mean locomotion speed (e) and maximum locomotion speed (f) before and after BTX injection in the mystacial pad ( $P > 0.05$  for all panels, Wilcoxon signed-rank test,  $n = 6$  FOVs, 2 sessions per FOV, 5 animals). L, locomotion. g, Modulation of WL neurons during spontaneous movements (WL), before and after unilateral mystacial pad paralysis induced by BTX injection ( $P < 0.001$ , regression).

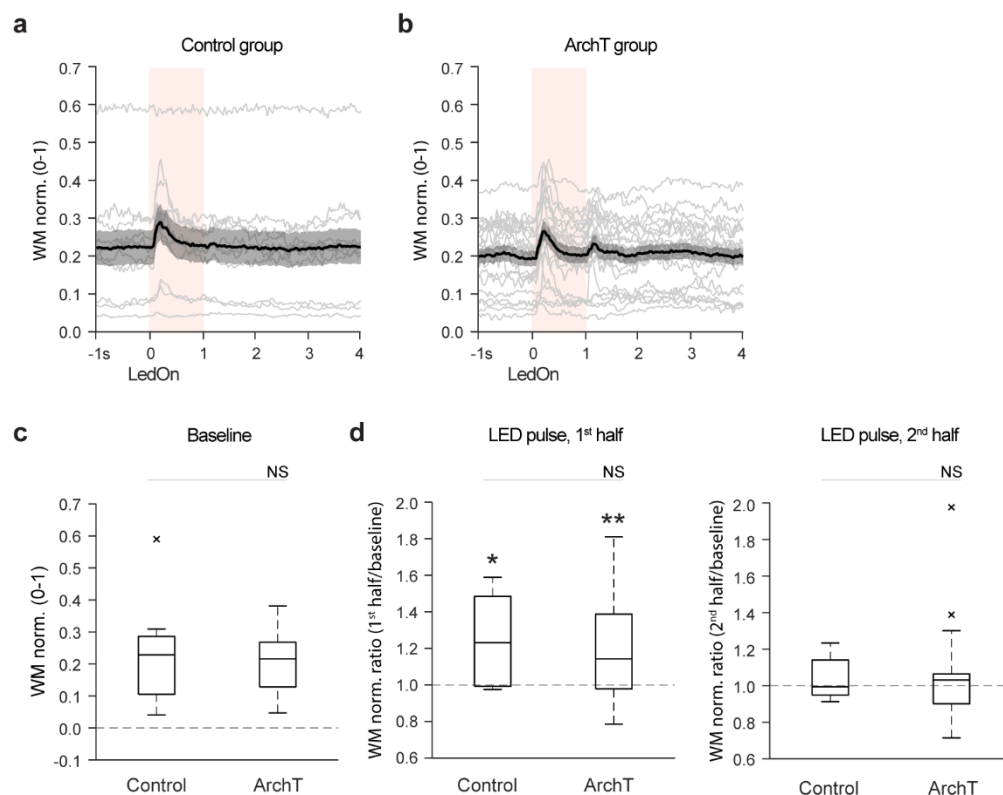

**Extended Data Fig. 14: Behavioral effect of light stimulation.** **a-b**, Effect of light presentation on the spontaneous movements of control (**a**) and ArchT-expressing (**b**) mice. Whisker movements (WM) aligned to the onset of light stimulation. **c**, WM during baseline (0.5 s window prior to light onset). Baseline WM was comparable between the two mouse groups ( $P < 0.05$ , Wilcoxon rank-sum test). **d**, Quantification of behavioral changes over the first half (left, 0 - 0.5 s) and second half (right, 0.5 - 1 s) of the light pulse relative to baseline. Both groups showed a brief (first half) increase in WM locked to light presentation onset ( $P < 0.05$ , Wilcoxon signed-rank test WM ratio  $\neq 1$  vs. WM ratio = 1), and this increase was comparable between the groups ( $P > 0.05$ , Wilcoxon rank-sum test). WM in the second half of the light pulse did not differ from that of baseline ( $P > 0.05$ , Wilcoxon signed-rank test WM ratio  $\neq 1$  vs. WM ratio = 1) and was similar between the groups ( $P > 0.05$ , Wilcoxon rank-sum test).

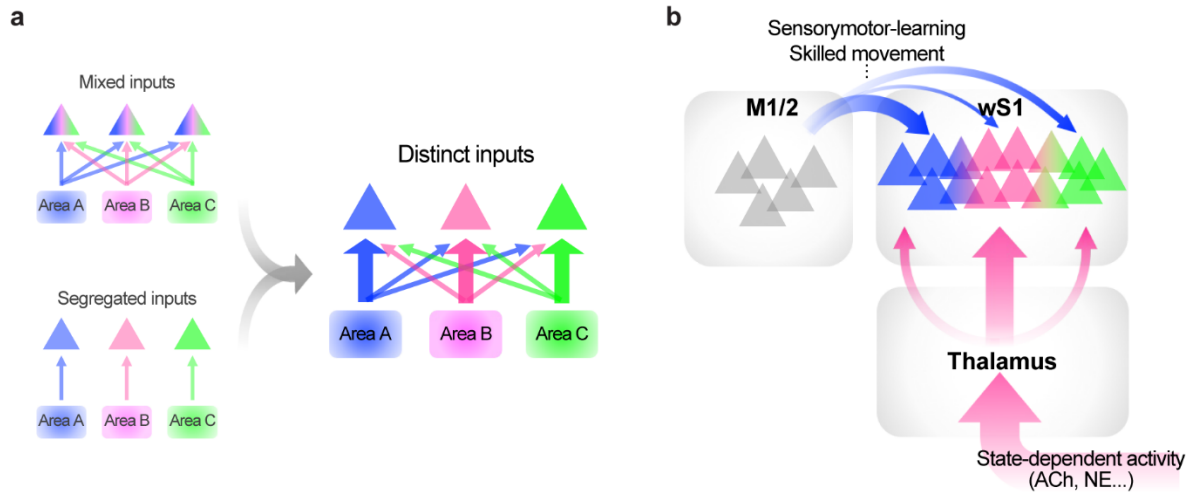

**Extended Data Fig. 15: Summary of the anatomical presynaptic connectivity rule and its proposed functional implications.**

**a**, Presynaptic connectivity rule underlying the functional heterogeneity of cortical PNs. NM and WL neurons did not receive separate sets of inputs nor completely random or mixed inputs from the distinct wS1-projecting areas. Instead, NM and WL neurons had distinct presynaptic networks characterized by a selective fractional decrease in M1/2 inputs and increase in thalamic inputs.

**b**, Hypothetical functional significance of distinct long-range inputs to wS1. While thalamic inputs may convey behavioral state-dependent activity, the M1/2 projection may instead be required for more complex changes in wS1 activity structure, such as establishment of new sensorimotor associations or acquisition of skilled movements.
